# Supplementary material for: Swallowing behaviours and feeding environment in relation to communication development from early infancy to 6 years of age: a scoping review protocol
Source: PubMed Central journal article supplement — BMJ Open. 2019 Aug 18;9(8):e028850. doi: 10.1136/bmjopen-2018-028850 (PMC6701691; doi:10.1136/bmjopen-2018-028850), 2019-08-18
Supplement: bmjopen-2018-028850.draft_revisions.pdf [file bmjopen-2018-028850.draft_revisions.pdf]

# BMJ Open

BMJ Open is committed to open peer review. As part of this commitment we make the peer review history of every article we publish publicly available.

When an article is published we post the peer reviewers' comments and the authors' responses online. We also post the versions of the paper that were used during peer review. These are the versions that the peer review comments apply to.

The versions of the paper that follow are the versions that were submitted during the peer review process. They are not the versions of record or the final published versions. They should not be cited or distributed as the published version of this manuscript.

BMJ Open is an open access journal and the full, final, typeset and author-corrected version of record of the manuscript is available on our site with no access controls, subscription charges or pay-per-view fees (<http://bmjopen.bmj.com>).

If you have any questions on BMJ Open's open peer review process please email [info.bmjopen@bmj.com](mailto:info.bmjopen@bmj.com)

# BMJ Open

## Swallowing behaviours and feeding environment in relation to communication development from early infancy to six years of age: A scoping review protocol

|                               |                                                                                                                                                                                                                                                                                                                                                                                                                                                                                                                                                                                                                                                                                                                                                      |
|-------------------------------|------------------------------------------------------------------------------------------------------------------------------------------------------------------------------------------------------------------------------------------------------------------------------------------------------------------------------------------------------------------------------------------------------------------------------------------------------------------------------------------------------------------------------------------------------------------------------------------------------------------------------------------------------------------------------------------------------------------------------------------------------|
| Journal:                      | <i>BMJ Open</i>                                                                                                                                                                                                                                                                                                                                                                                                                                                                                                                                                                                                                                                                                                                                      |
| Manuscript ID                 | bmjopen-2018-028850                                                                                                                                                                                                                                                                                                                                                                                                                                                                                                                                                                                                                                                                                                                                  |
| Article Type:                 | Protocol                                                                                                                                                                                                                                                                                                                                                                                                                                                                                                                                                                                                                                                                                                                                             |
| Date Submitted by the Author: | 27-Dec-2018                                                                                                                                                                                                                                                                                                                                                                                                                                                                                                                                                                                                                                                                                                                                          |
| Complete List of Authors:     | Flowers, Heather ; University of Ottawa, School of Rehabilitation Sciences, Faculty of Health Sciences; Institut du savoir Montfort - A Knowledge Insitute<br>Bérubé, Daniel; University of Ottawa Faculty of Health Sciences, School of Rehabilitation Sciences<br>Ebrahimipour, Mona; University of Ottawa Faculty of Health Sciences, School of Rehabilitation Sciences; Elisabeth-Bruyere Hospital<br>Perrier, Marie-France; University of Ottawa Faculty of Health Sciences, School of Rehabilitation Sciences; Children's Hospital of Eastern Ontario<br>Moloci, Sarah; Hopital Montfort<br>Skoretz, Stacey; University of British Columbia, School of Audiology and Speech Sciences; University of Alberta, Faculty of Medicine and Dentistry |
| Keywords:                     | PAEDIATRICS, REHABILITATION MEDICINE, swallowing, feeding, communication development                                                                                                                                                                                                                                                                                                                                                                                                                                                                                                                                                                                                                                                                 |
|                               |                                                                                                                                                                                                                                                                                                                                                                                                                                                                                                                                                                                                                                                                                                                                                      |

SCHOLARONE™  
Manuscripts

1  
2  
3 **Swallowing behaviours and feeding environment in relation to communication**  
4 **development from early infancy to six years of age: A scoping review protocol**  
5  
6  
7

8  
9 **Corresponding Author:**

10  
11 Heather Leslie Flowers<sup>1-4</sup>  
12 451 Smyth Road, room 3071  
13 Roger Guindon Hall  
14 School of Rehabilitation Sciences  
15 University of Ottawa  
16 Ottawa, ON  
17 K1H 8M5  
18 Canada  
19 Email: [heather.flowers@uottawa.ca](mailto:heather.flowers@uottawa.ca)  
20 Tel : 613-562-5800 ext 8400  
21  
22

23  
24 **Co-authors:**

25  
26 Daniel Bérubé<sup>1</sup>  
27 Mona Ebrahimipour<sup>1,5,6</sup>  
28 Marie-France Perrier<sup>1,7</sup>  
29 Sarah Moloci<sup>8</sup>  
30 Stacey Ann Skoretz<sup>9-11</sup>  
31  
32

- 33 1. School of Rehabilitation Sciences, University of Ottawa, Ottawa, ON, Canada  
34 2. Institut du Savoir – Montfort – A Knowledge Institute, Ottawa, ON, Canada  
35 3. The Ottawa Hospital Research Institute, Ottawa, ON, Canada  
36 4. Toronto General Hospital, University Health Network, Toronto, ON, Canada  
37 5. Department of Speech Therapy, University of Social Welfare and Rehabilitation  
38 Sciences, Tehran, Iran  
39 6. Elisabeth Bruyère Hospital, Ottawa, ON, Canada  
40 7. Children’s Hospital of Eastern Ontario, Ottawa, ON, Canada  
41 8. Montfort Hospital, Ottawa, ON, Canada  
42 9. School of Audiology and Speech Sciences, University of British Columbia,  
43 Vancouver, BC, Canada  
44 10. Department of Critical Care Medicine, University of Alberta, Edmonton, AB, Canada  
45 11. Centre for Heart Lung Innovation, St. Paul’s Hospital, Vancouver, BC, Canada  
46  
47  
48  
49  
50

51 **Word count:** 3053  
52  
53  
54  
55  
56  
57

## ABSTRACT:

**Introduction:** Understanding the influences of early swallowing function and feeding environment on the development of communication will enhance prevention and intervention initiatives for young children. This scoping review will help elucidate key elements affecting the developmental trajectory of communicative systems, typically robust and well-developed by formal school entry. We aim to i) map the current state of the literature in a growing field of interest that has the potential to advance knowledge translation, ii) identify existing gaps, and iii) provide direction for future investigations.

**Methods and analysis:** We are proposing a scoping review to identify the breadth and depth of the existing literature regarding swallowing-feeding functions and environment relative to the onset and progression of communicative behaviours from infancy to six years of age. Our protocol delineates rigorous methods according to Arskey and O'Malley's framework and includes elaborations by Levac and colleagues. We will search the literature based on 10 databases 16 peer-reviewed journals, 4 conference proceedings, and 6 grey literature sources and use forward and backward chaining. Two authors will independently screen abstracts and review full articles, remaining blind to each other's results. A third author will contribute to resolving any discrepant results from both the abstract and article review. Subsequently, we will extract data and chart information from accepted articles using a pre-established data collection form. We will stratify results according to healthy versus impaired swallowing-feeding functions and communication development.

**Ethics and dissemination:** Our scoping review does not require ethical approval. We will disseminate our final study results through international and national conference presentations, publication in a peer-reviewed journal, and knowledge translation activities with stakeholders.

## STRENGTHS AND LIMITATIONS OF THE STUDY:

- A key strength includes a first and comprehensive literature mapping for research on the influence of early swallowing-feeding behaviours and environment on communication development
- A second strength includes a rigorous search design involving multiple sources, such as databases, journals, conference proceedings, and the grey literature
- An inherent limitation of our scoping review is that we will not conduct quality appraisal for individual articles given anticipated breadth of results and research designs

**BACKGROUND:**

There has been growing interest in the effects of swallowing and feeding functions on the development of communicative systems in young children. Research is necessary to understand the complexity of influences that may foster optimal development and conversely forestall delays, especially in the wake of increasingly prevalent communication disorders. Whether children incur communication disorders via unknown causes or via predisposing conditions, a high proportion of newborn babies can be expected to develop a communication disorder, and they are vulnerable from birth through to diagnosis and beyond. Various prenatal, perinatal, or postnatal congenital abnormalities or conditions, including syndromes, cerebral palsy, and premature birth, may predispose children to impaired communication development. Currently, congenital syndromes affect about four percent of Canadian babies.[1] In particular, the birth prevalence of Down syndrome is 0.16 percent [2] and orofacial clefts are evidenced in 0.13 percent of live births.[3] Even more prevalent, cerebral palsy ranges from 0.31 to 0.36 percent of eight year old children in the USA.[4] Far exceeding the prevalence of other conditions, prematurity is currently estimated at 8 percent of all births,[5] and ensuing difficulties may persist throughout childhood.

In fact, eight percent of American children aged three to 17 years has a speech, language, voice, or swallowing disorder.[6] More specifically, a recent population study demonstrated a frequency of language disorders by entry to mainstream schooling in 10 percent of children.[7] Close to one-third of the sample had a language disorder of unknown cause,[7] which is often attributable to specific language impairment.[8] Similarly, the prevalence of language impairment in Canadian kindergarteners is about

1  
2  
3 eight percent.[9] Concerning speech acquisition, approximately 15 percent of three-year  
4  
5 old and four percent of six-year old children have a speech sound disorder.[10] Speech  
6  
7 and/or language impairments often co-occur, affecting over 10 percent of kindergarten  
8  
9 children.[9] They may be also present in children with social communication  
10  
11 impairments, such as autism spectrum disorder, which affects one and a half percent of  
12  
13 Canadian children currently.[11]

14  
15  
16  
17       Despite good epidemiological information and a long history of research on  
18  
19 speech and language development in the preschool years,[12-16] a significant gap exists  
20  
21 concerning knowledge of the earliest precursors to communication.[12] They include  
22  
23 vocalizations of the newborn infant such as cries, vegetative sounds, and comfort sounds  
24  
25 such as cooing, as described in Stark and her colleague's (1978)[17] seminal study, all  
26  
27 occurring well before the onset of reduplicated babbling.[12] Cooing is an early speech-  
28  
29 like behaviour, occurring as early as one month of age,[17] and it may well be a hallmark  
30  
31 indicator to the healthy progression of higher order speech and communicative systems  
32  
33 because of its association with positive affect and relational interactions.[18]  
34  
35  
36  
37 Notwithstanding, the nature and potential early facilitators of healthy or optimal  
38  
39 development of communication remain elusive. Given the highly responsive and largely  
40  
41 reflexive behaviours in the neonatal period, young infants are difficult to evaluate and  
42  
43 monitor in a natural setting. Consequently, there remains a paucity of literature on very  
44  
45 early onset of vocalizations and progression toward the development of symbolic  
46  
47 communication. An ideal naturalistic early context for understanding communication  
48  
49 development includes physiologically-driven periods when infants are alert, most notably  
50  
51 prior to and during feeding sequences. For example, early vocalizations of contentment  
52  
53  
54  
55  
56  
57  
58  
59  
60

1  
2  
3 may be inextricably linked to the feeding context.[19] Interestingly, infants remain by  
4 and large dependent for feeding, until just about the time when symbolic communication  
5 and joint attention emerge (8 to 12 months).[20] Consequently, the feeding environment  
6 can promote optimal linguistic exposure and interactions, facilitating development of the  
7 auditory system and various basic motor functions of the vocal tract.[21]  
8  
9

10  
11  
12  
13  
14  
15 Various theoretical premises exist regarding the development of communication:  
16  
17 i) one revolving around the tightly-coordinated and integrative physiological  
18 development of the respiratory and vocal/articulatory systems,[22,23] ii) another  
19 particularly centered on intrinsic innate developmental stages for speech and language  
20 acquisition,[24,25] and iii) a third pertaining to a connectionist framework for speech  
21 production and/or processing alongside learning demands,[26] dependent on capacity for  
22 resource allocation.[27] By extension, a connectionist model could intuitively include  
23 physiological integrity as necessary for higher-level resource allocation, whereby  
24 excessive demands or dysfunction would preclude optimal activation of complex  
25 behaviours and cognitive processing. Conversely, physiological integrity coupled with  
26 environmental facilitators would permit the necessary resource allocation for the optimal  
27 development of integrated networks for communicative systems, ensuring appropriate  
28 stage to stage developmental progression.  
29  
30  
31  
32  
33  
34  
35  
36  
37  
38  
39  
40  
41  
42  
43

44  
45 To illustrate, from a physiological standpoint, both respiration and swallowing are  
46 primordial life-sustaining functions, and they are inextricably linked and tightly  
47 coordinated behaviours.[28,29,30] Consequently, integrity of swallowing depends upon  
48 adequate respiratory functions and together they provide the physiological and  
49 neurological basis for developing voice and speech functions.[22,23] Physiological  
50  
51  
52  
53  
54  
55  
56  
57  
58  
59  
60

1  
2  
3 integrity of swallowing coupled with a facilitative feeding environment[21] may well  
4  
5 optimize connections and prime the development of neural networks for communication.  
6  
7  
8 There is a need to collect additional knowledge about swallowing/feeding and  
9  
10 speech/language relationships to help us improve our current understanding of healthy  
11  
12 versus disordered development of communication. Specifically, we want to improve the  
13  
14 processes of early detection, evaluation, and intervention for swallowing/feeding and  
15  
16 associated communicative functions in an integrated manner.  
17  
18  
19  
20

### 21 **Rationale:**

22  
23 Identifying relationships between early physiological functions (such as feeding and  
24  
25 swallowing) and communication (from speech-like behaviours such as cooing to  
26  
27 phonological development for meaningful word production and language use in  
28  
29 discourse) will help us improve our understanding of the development of communication.  
30  
31  
32 We need to consider these relationships starting in early infancy because the feeding  
33  
34 context has great potential as a facilitative environment for social interactions.  
35  
36  
37 Nevertheless, problems with swallowing function and/or suboptimal feeding environment  
38  
39 may have a grossly prohibitive effect on optimal and healthy development of  
40  
41 communicative systems. We still need a comprehensive understanding of precursors and  
42  
43 determinants longitudinally from birth to the age of six, when most children begin formal  
44  
45 schooling.  
46  
47  
48  
49  
50  
51  
52  
53  
54  
55  
56  
57  
58  
59  
60



## **Objectives:**

The primary objective of our scoping review is to provide an overview of the literature considering the association between swallowing physiology and feeding environment and the development of communicative functions, whether healthy or disordered. The specific objectives include: 1) identifying the number and design of articles over time, 2) mapping sample characteristics and study themes in the existing literature, and 3) identifying gaps in knowledge pertaining to the contribution of swallowing function and feeding environment to the development of communicative systems in infants and young children.

## **METHODS AND ANALYSIS**

### **Operational Definitions**

We have defined swallowing to include oropharyngeal and/or esophageal stages[31] involving anatomical, neurological (e.g. coordinated respiratory/swallowing behaviours), and/or physiological functions. Pediatric feeding includes i) interest in feeding[32] and consequent environmental engagement, ii) behavioural manifestations of dietary preferences, and/or iii) progression through developmentally appropriate food and/or liquid consistencies and type.[33] As such, feeding does not include nutritional aspects of intake and/or diet, such as adequacy of macro or micronutrients.

Communication refers to the exchange of information, ideas, needs, and desires between at least two persons.[20] It involves both linguistic and paralinguistic codes,[20] whereby methods of transmission include speech, intonation, gestures, and body language.[20] Examples of earliest behavioural manifestations may include first words or manual signs, presenting in children as young as 8 months,[20] rapidly increasing in

1  
2  
3 complexity.[34] For the purpose of this scoping review, the definition of communication  
4 encapsulates the entire developmental progression from earliest precursors in the  
5 newborn infant to the use of near adult-like constructs by school entry.[20]  
6  
7

8  
9  
10 Therefore, we need to appreciate factors involving swallowing physiology and  
11 feeding relative to the onset of pre-linguistic vocalisations and progression towards a  
12 highly complex communicative system. Such an understanding will help identify early  
13 facilitators or prognostic indicators of delay in the development of communication,  
14 whether speech, language, or social communication (or a combination therein). A recent  
15 shift in culture in health-care settings has already manifested, where recommended  
16 feeding practices follow from infant cues for readiness,[35,36] rather than from oral  
17 motor abilities (such as non-nutritive sucking) or from quantity of ingested feeds.[36]  
18 Accordingly, there has been a recent increase in attention to pediatric feeding-swallowing  
19 disorders and their relationship to communication development.[37-42] Research  
20 investigations involving swallowing behaviours and feeding are badly needed to guide  
21 preventative and clinical treatment initiatives to promote the healthy development of  
22 communication from infancy to school entry.  
23  
24  
25  
26  
27  
28  
29  
30  
31  
32  
33  
34  
35  
36  
37  
38  
39  
40  
41

## 42 **Framework**

43  
44 Given the breadth of our topic, we chose to conduct a scoping review to provide an  
45 evidence map[43] for key concepts and definitions in the emerging evidence base.[43]  
46  
47 Our scoping review follows Arskey and O'Malley's framework involving six stages,[44]  
48 including elaborations, such a clearly articulated reason and scope of inquiry as well as a  
49 transparent and replicable approach to study selection.[45] We will use the PRISMA-P  
50  
51  
52  
53  
54  
55  
56  
57  
58  
59  
60

1  
2  
3 reporting checklist[46,47] as a guide for the process of literature appraisal and for  
4  
5 reporting results.  
6  
7  
8  
9

### 10 **Stage 1: identifying the research questions:**

11  
12 We have developed a single broad research question to inform our search strategy and to  
13  
14 derive key domains for our results. We seek to understand the foundational  
15  
16 underpinnings of the early development of communication in relation to its inherent  
17  
18 physiological and environmental precursors surrounding early swallowing and feeding  
19  
20 behaviours. The overarching broad question that our review addresses is:  
21  
22 “What early feeding/swallowing factors influence communication development from  
23  
24 birth to six years of age?”  
25  
26  
27

28 Our line of inquiry includes early child development in both health and congenital or  
29  
30 acquired diseases/disorders. Consequently, our review will facilitate an appreciation of  
31  
32 swallowing-feeding factors that relate to the development of communication within an  
33  
34 epidemiological framework. Underlying secondary questions relate to swallowing  
35  
36 physiology and the feeding environment more specifically. The development of our  
37  
38 secondary questions results from an iterative process, whereby reformulations of the  
39  
40 questions posed *a priori* (i.e, those identified herein) may result and/or new questions  
41  
42 may arise. Our secondary questions currently include:  
43  
44  
45  
46

- 47 i. What underlying congenital problems (e.g., cerebral palsy,  
48  
49 cardiac/respiratory/gastrointestinal anatomical defects, neurological syndromes,  
50  
51 prematurity, transient birth-related distress) impact swallowing-feeding integrity  
52  
53 and the development of communicative functions?  
54  
55  
56  
57

- 1  
2  
3 ii. What swallowing-related impairments (e.g., poor respiratory function, reflux,  
4 weak neonatal latch/sucking behaviours) compromise or delay the onset of  
5 communicative functions?  
6  
7  
8  
9  
10 iii. How do feeding environments alter the onset and course of development of  
11 communicative functions?  
12  
13 a. feeding mode (breast, bottle, combination feeding, enteral feeding)  
14  
15 b. setting (neonatal intensive care unit stay, hospital stay, interventions such  
16 as incubation for phototherapy)  
17  
18 c. interactive constructs (quality and quantity of feeding-related verbal  
19 interactions and/or tactile interactions of dyads)  
20  
21  
22  
23  
24  
25  
26  
27  
28

## 29 **Stage 2: identifying relevant studies**

30  
31 The search strategy for Medline was developed in three steps by the first (HF) and third  
32 authors (ME) with input by the final author (SAS) through ongoing consultation with a  
33 research librarian. First, we undertook a consultative process, whereby we analysed and  
34 reviewed all MeSH terms associated with communicative functions and  
35 feeding/swallowing behaviours multiple times to maximize specificity while retaining the  
36 necessary scope of inquiry. Subsequently, the first and third authors chose MeSH terms  
37 for explosion if all subordinate terms were truly relevant to the content area and research  
38 questions. Second, review of other relevant systematic or scoping reviews revealed  
39 additional possibilities for MeSH terms and context-dependent terms (e.g., title, abstract,  
40 and key words) in the areas of swallowing-feeding[48-51] and communication[52-55].  
41  
42  
43  
44  
45  
46  
47  
48  
49  
50  
51  
52  
53

54 The two authors (HF and ME) developing the search strategy selected terms for a  
55  
56  
57

1  
2  
3 pediatric population from a published filter,[56] identified by the research librarian,  
4 rather than limit the search within Medline. Finally, we developed additional context-  
5 dependent terms that we felt were not be captured from the previous two steps based on  
6 our expert knowledge of the fields of swallowing and communicative sciences. The  
7 research librarian then confirmed the integrity of the terms and search strategy (Table 1)  
8 and provided consultation for additional databases to search.  
9

10 We selected nine additional databases to search based on adaptations of the  
11 Medline search terms (Table 2). We did not include PubMed as part of the search, given  
12 the possibility of its referencing predatory journals.[57] We consider our set of selected  
13 databases sufficient to capture potentially-relevant PubMed citations. We will not apply  
14 date or language limits on the searches to the extent possible. That is, we will  
15 accommodate languages that we can read (including at least English, French, German,  
16 Italian, Persian, and Spanish) and seek translations for other languages (if possible) from  
17 colleagues and contacts within our scientific communities. All study designs are of  
18 interest, including case reports, case series, qualitative, cohort, case-control, and quasi-  
19 experimental studies, as well as randomised controlled trials. Further, we identified 16  
20 journals, 4 conference proceedings, and 6 grey literature sources (Table 2). We will  
21 review the reference lists and citations of selected articles through Google Scholar using  
22 a process of forward and backward chaining.[58]  
23  
24  
25  
26  
27  
28  
29  
30  
31  
32  
33  
34  
35  
36  
37  
38  
39  
40  
41  
42  
43  
44  
45  
46  
47  
48  
49  
50  
51  
52  
53  
54  
55  
56  
57  
58  
59  
60

Table 1. Medline search strategy

| Item | Term Set                                                                                                                                                                                                    | Area       |
|------|-------------------------------------------------------------------------------------------------------------------------------------------------------------------------------------------------------------|------------|
| 1    | exp Deglutition/                                                                                                                                                                                            | swallowing |
| 2    | exp Gastroesophageal Reflux/                                                                                                                                                                                | swallowing |
| 3    | Deglutition disorders/                                                                                                                                                                                      | swallowing |
| 4    | "Feeding and Eating Disorders of Childhood"/                                                                                                                                                                | swallowing |
| 5    | Breast feeding/                                                                                                                                                                                             | swallowing |
| 6    | Bottle Feeding/                                                                                                                                                                                             | swallowing |
| 7    | Feeding Methods/                                                                                                                                                                                            | swallowing |
| 8    | Enteral Nutrition/                                                                                                                                                                                          | swallowing |
| 9    | Parenteral Nutrition/                                                                                                                                                                                       | swallowing |
| 10   | Kangaroo-Mother Care Method/                                                                                                                                                                                | swallowing |
| 11   | Pacifiers/                                                                                                                                                                                                  | swallowing |
| 12   | sucking behaviors/                                                                                                                                                                                          | swallowing |
| 13   | ((enteral or tube or gastric) adj (feed\$)).ti,ab,kw.                                                                                                                                                       | swallowing |
| 14   | ((deglut\$ or feed\$ or swallow\$ or feed\$-swallow\$) adj3 (difficult\$ or disorder\$ or abnormal\$ or delay\$ or dysfunction\$ or impair\$ or problem\$ or disabil\$ or disabl\$ or deficit\$)).ti,ab,kw. | swallowing |
| 15   | ((deglut\$ or feed\$ or swallow\$ or feed\$-swallow\$) adj3 (behavior or develop\$ or neurodevelop\$ or matur\$ or function\$)).ti,ab,kw.                                                                   | swallowing |
| 16   | (dysphag\$).ti,ab,kw.                                                                                                                                                                                       | swallowing |
| 17   | ((bottle fe\$) or (bottlefe\$) or (breast fe\$) or (breastfe\$) or (feeding mode) or (feeding methods)).ti,ab,kw.                                                                                           | swallowing |
| 18   | ((gastroesophageal or gastro-esophageal or infantile or gastric) adj3 (reflux or regurgitat\$)).ti,ab,kw.                                                                                                   | swallowing |
| 19   | exp Speech/                                                                                                                                                                                                 | comm       |
| 20   | exp Speech disorders/                                                                                                                                                                                       | comm       |
| 21   | exp Language development disorders/                                                                                                                                                                         | comm       |
| 22   | exp Child language/                                                                                                                                                                                         | comm       |
| 23   | Speech sound disorder/                                                                                                                                                                                      | comm       |
| 24   | Verbal behavior/                                                                                                                                                                                            | comm       |
| 25   | Manual communication/                                                                                                                                                                                       | comm       |
| 26   | Communication disorders/                                                                                                                                                                                    | comm       |
| 27   | Social communication disorder/                                                                                                                                                                              | comm       |
| 28   | Autism Spectrum Disorder/                                                                                                                                                                                   | comm       |
| 29   | Language disorders/                                                                                                                                                                                         | comm       |
| 30   | Language Development/                                                                                                                                                                                       | comm       |
| 31   | ((speech or oromotor or "oral motor" or verbal\$ or oro-motor or orofacial or oro-facial or "oral facial") adj3 (aprax\$ or dysprax\$ or prax\$)).ti,ab,kw.                                                 | comm       |

|    |                                                                                                                                                                                                                                                                                                                                                                                                                                                                     |            |
|----|---------------------------------------------------------------------------------------------------------------------------------------------------------------------------------------------------------------------------------------------------------------------------------------------------------------------------------------------------------------------------------------------------------------------------------------------------------------------|------------|
| 32 | ((speech or speak\$ or oral or language or verbal\$ or communication or voice or vocal\$ or babbl\$ or coo\$ or "oral motor" or oromotor or oromotor or orofacial or oro-facial or "oral facial" or oralfacial or articulat\$ or phonetic\$ or phonologic\$ or phonemic\$ or pre-linguistic or prelinguistic) adj3 (difficult\$ or disorder\$ or abnormal\$ or delay\$ or dysfunction\$ or impair\$ or problem\$ or disabil\$ or disabl\$ or deficit\$)) .ti,ab,kw. | comm       |
| 33 | ((speech or speak\$ or oral or language or verbal\$ or communication or voice or vocal\$ or babbl\$ or coo\$ or "oral motor" or oromotor or oromotor or orofacial or oro-facial or "oral facial" or oralfacial or articulat\$ or phonetic\$ or phonologic\$ or phonemic\$ or pre-linguistic or prelinguistic) adj3 (behavior or develop\$ or neurodevelop\$ or matur\$ or acqui\$)) .ti,ab,kw.                                                                      | comm       |
| 34 | exp child/                                                                                                                                                                                                                                                                                                                                                                                                                                                          | population |
| 35 | exp infant/                                                                                                                                                                                                                                                                                                                                                                                                                                                         | population |
| 36 | adolescent/                                                                                                                                                                                                                                                                                                                                                                                                                                                         | population |
| 37 | (pediatric* or paediatric* or child* or newborn* or infan* or baby or babies or neonat* or pre-term or preterm* or premature birth* or NICU or preschool* or pre-school* or kindergarten* or kindergarden* or elementary school* or nursery school* or schoolchild* or toddler* or boy or boys or girl* or middle school* or pubescen* or jevenile* or teen* or youth* or high school* or adolesc* or pre-pubesc* or prepubesc*).mp.                                | population |

Table 2. Complete list of search sources including databases, journals, conference proceedings, and grey literature

| Literature Type        | Sources                                                                                                                                                                                                                                                                                                                                                                                                                                                                                                                                                                                                                                                                                                                                           |
|------------------------|---------------------------------------------------------------------------------------------------------------------------------------------------------------------------------------------------------------------------------------------------------------------------------------------------------------------------------------------------------------------------------------------------------------------------------------------------------------------------------------------------------------------------------------------------------------------------------------------------------------------------------------------------------------------------------------------------------------------------------------------------|
| Databases:             | <ul style="list-style-type: none"> <li>- AMED</li> <li>- CINHAL</li> <li>- Education Source</li> <li>- Embase</li> <li>- ERIC</li> <li>- Linguistics and Language Behaviour Abstracts</li> <li>- Medline</li> <li>- PsycInfo</li> <li>- Scopus</li> <li>- Web of Science</li> </ul>                                                                                                                                                                                                                                                                                                                                                                                                                                                               |
| Journals:              | <ul style="list-style-type: none"> <li>- American Journal of Speech-Language Pathology</li> <li>- Canadian Journal of Speech-Language Pathology</li> <li>- Child Development</li> <li>- Clinical Linguistics and Phonetics</li> <li>- Developmental Medicine and Child Neurology</li> <li>- Dysphagia</li> <li>- Gastroenterology</li> <li>- Infancy</li> <li>- International Journal of Behavioral Development</li> <li>- International Journal of Speech-Language Pathology</li> <li>- Journal of Child Language</li> <li>- Journal of Communication Disorders</li> <li>- Journal of Pediatric Gastroenterology and Nutrition</li> <li>- Journal of Pediatrics</li> <li>- Nature</li> <li>- The American Journal of Gastroenterology</li> </ul> |
| Conference Proceedings | <ul style="list-style-type: none"> <li>- ASHA Conference</li> <li>- Dysphagia Research Society</li> <li>- International Conference on Speech and Language Development</li> <li>- World pediatrics</li> </ul>                                                                                                                                                                                                                                                                                                                                                                                                                                                                                                                                      |
| Grey Literature:       | <ul style="list-style-type: none"> <li>- Networked Digital Library of Theses and Dissertations</li> <li>- Open Access Theses and Dissertations</li> <li>- Open Grey</li> <li>- Proquest Dissertations and Theses Global</li> <li>- Ontario Public Health Libraries Association</li> <li>- Grey Matters</li> </ul>                                                                                                                                                                                                                                                                                                                                                                                                                                 |



### Stage 3: selecting studies

We will compile and store all citations using Covidence[59] and Microsoft Excel. Following elimination of duplicates and citations without abstracts, we will review the remaining abstracts and articles in a two-step process. Two independent reviewers will code the abstracts for potential inclusion or exclusion (Table 3). Coding criteria are purposefully open-ended for abstract review to permit selection of all those potentially relevant for full article retrieval. Additionally, codes are hierarchical, such that if code 1 is relevant, and the abstract therefore deemed ineligible, the remaining codes are not applicable. Subsequently, the two abstract reviewers will discuss and resolve discrepancies by consensus, requesting input from a third reviewer for consensus deliberations. All abstracts not assigned an exclusion code will be accepted for full review.

The same process will apply to full article review to determine final articles for inclusion. That is, two reviewers, blind to each other's evaluations, will independently assess all full articles, determining eligibility for inclusion according to more stringent and hierarchically-coded criteria (Table 3). Any articles written in languages outside of those understood by the two reviewers will undergo translation (if possible) for key methodological content to enable coding. Coding criteria for the full article review will be more stringent than for the abstract review, since all pertinent information will be available and reviewers will make a final decision about article selection. Where discrepancies exist, the two reviewers engage in discussion to achieve consensus regarding inclusion or exclusion. In the event of difficult resolution, a third reviewer will assist in consensus deliberations. That is, all three reviewers will revisit the article in a

process of reiterative evaluation to determine final inclusion or exclusion of the article.

All codes and final decisions for inclusion or exclusion from both abstract and full article reviews will be entered into the Excel datasheet.

Articles without exclusion codes will be accepted for the scoping review.

Accepted articles that initially required translation will undergo a second review (if possible) by the same translator and/or a different translator to ensure that the appropriate content is available for data extraction and charting.

Table 3. Proposed coding categories for abstract and full article review

| Step 1 - Exclude if abstract:                                                                                 | Step 2 – Exclude if full article:                                                                             |
|---------------------------------------------------------------------------------------------------------------|---------------------------------------------------------------------------------------------------------------|
| 1) is clearly a review, commentary, or opinion                                                                | 1) is clearly a review, commentary, or opinion                                                                |
| 2) clearly has only an adult sample ( $\geq 18$ years of age)                                                 | 2) has a sample exclusively outside desired age range ( $\geq 7$ years of age)                                |
| 3) swallowing/feeding context outside operational definition (i.e. relates exclusively to nutritional intake) | 3) swallowing/feeding context outside operational definition (i.e. relates exclusively to nutritional intake) |
| 4) outcomes relating to communication or other aspects of child development (motor, cognitive) clearly absent | 4) outcomes relating to communication clearly absent                                                          |
| 5) n/a                                                                                                        | 5) outcomes relating to swallowing/feeding and communication development clearly absent                       |
| 6) clearly involves same data as another abstract                                                             | 6) clearly involves same data as another article                                                              |
| Otherwise accept for full article retrieval                                                                   | Otherwise accept for scoping review                                                                           |

#### Stage 4: charting the data

Multiple reviewers will be responsible for collecting data, each from a proportion of the articles, followed by independent verification of all data by research personnel. Data

collection will involve documenting key characteristics and variables of interest for each article (Table 4) and recording them in a database for storage and analysis. All reviewers collecting and charting data will be responsible for ongoing communication about emerging themes or domains of inquiry that could alter and enhance data collection procedures.

Table 4: Basic study characteristics for extraction from each accepted article.

| Categories                | Characteristics                                                                                                                                                                                                                                                                                                                                                          |
|---------------------------|--------------------------------------------------------------------------------------------------------------------------------------------------------------------------------------------------------------------------------------------------------------------------------------------------------------------------------------------------------------------------|
| 1) Article details        | Article details <ul style="list-style-type: none"> <li>- year of publication</li> <li>- document type (peer-reviewed journal article, thesis, government document, conference proceeding or published abstract)</li> <li>- location of study (country)</li> </ul>                                                                                                        |
| 2) Study details          | Study details <ul style="list-style-type: none"> <li>- design (cohort, case-series, RCT, case study, case series, qualitative)</li> <li>- time frame (cross-sectional, longitudinal)</li> <li>- setting (hospital, home)</li> <li>- population (children with typical communication development, children with disordered/atypical communication development)</li> </ul> |
| 3) Sample characteristics | Sample characteristics <ul style="list-style-type: none"> <li>- sample size</li> <li>- groups</li> <li>- age range</li> <li>- sex/gender</li> <li>- ethnicity</li> <li>- language(s) used</li> <li>- etiology (if applicable)</li> <li>- comorbidities (if applicable)</li> <li>- hearing status</li> </ul>                                                              |
| 4) Study outcomes         | Feeding/swallowing <ul style="list-style-type: none"> <li>- physiology and behaviours</li> <li>- environment</li> <li>- modes</li> </ul> Communication development                                                                                                                                                                                                       |

|                            |                                                                                                                                                                                                                              |
|----------------------------|------------------------------------------------------------------------------------------------------------------------------------------------------------------------------------------------------------------------------|
|                            | <ul style="list-style-type: none"> <li>- speech (early vocalizations, babbling, protowords, single word production, multiword production)</li> <li>- language (content, form, use)</li> <li>- gestural behaviours</li> </ul> |
| 5) Main findings of study  | Trends<br>Effects                                                                                                                                                                                                            |
| 6) Data analyses           | Type<br>Rigour                                                                                                                                                                                                               |
| 7) Themes/domains of study | Barriers to communication development<br>Facilitators to communication development                                                                                                                                           |
| 8) Study limitations       | Design<br>Outcomes<br>Generalizations                                                                                                                                                                                        |
| 9) Pertinence[43]          | Clinical practice<br>Policy<br>Research                                                                                                                                                                                      |

### Stage 5: collating, summarizing, and reporting the results

Data from stage 4 will be summarized to map the emergence and breadth of literature over time for the primary objective. Subsequently, we will stratify the findings according to healthy versus impaired development. Various forms of data presentation will include tables, line graphs (for chronological information), histograms, and/or pie charts. To illustrate, we will tabulate study characteristics according to design, population, setting, and pertinence for policy, clinical practice, or research. Similarly, we will visually represent information pertaining to swallowing-feeding functions and domains of communication development in charts. Where available, we will describe themes that arise from our review, including barriers and facilitators to the development of communicative functions in young children.

Our scoping review will therefore provide a first overview of trends and breadth for an emerging body of literature. Most important, we will identify gaps in the current

1  
2  
3 knowledge base and provide guidance for the prevention and treatment of potential  
4  
5 communication impairments beginning in early infancy.  
6  
7

## 8 9 **DISCUSSION (DISSEMINATION)**

10 Following completion of all stages of scoping review, findings will be disseminated via  
11  
12 local and international conference presentations and submission to a peer-reviewed  
13  
14 journal. Knowledge translation activities will then include development of accessible  
15  
16 materials for end-users, such as parents, infant caregivers, and clinicians from various  
17  
18 fields of professional practice, so that they may understand and advocate best practice for  
19  
20 communicative development in children. In addition, we will share our findings with  
21  
22 policy-making organizations and other stakeholders, such as the Canadian Child and  
23  
24 Youth Health Coalition and the Paediatric International Patient Safety and Quality  
25  
26 Collaborative.  
27  
28  
29  
30  
31  
32

33 **Acknowledgments/Contributors:** The authors acknowledge Marie-Cécile Domecq from  
34  
35 the Health Sciences Library, Faculty of Health Sciences, University of Ottawa, for her  
36  
37 advice and availability for consultation during the development of the current scoping  
38  
39 review protocol.  
40  
41  
42  
43  
44

45 **Contributors:** All co-authors provided meaningful and unique contributions to the  
46  
47 development, preparation, and/or writing of the current scoping review protocol. HF  
48  
49 formulated the topic and conceptualized the questions and theoretical framework. She  
50  
51 also guided the research team at all stages of the review development and wrote the bulk  
52  
53 of the protocol. DB contributed critical and novel insight for the research questions,  
54  
55  
56  
57  
58  
59  
60

1  
2  
3 theoretical framework, and review components relative to communicative functions. SAS  
4 contributed critical and novel insight for the research questions and for operational  
5 definitions relative to swallowing functions. She also provided advice for scoping review  
6 methods and proposed analyses. ME provided conceptual input in the development of the  
7 search terms relating to communicative functions in collaboration with HF and in  
8 consultation from a research librarian. M-FP contributed to writing the introduction,  
9 especially with respect to epidemiology of communication impairments. SM contributed  
10 by drafting ideas related to the clinical relevance of the scoping review. All authors  
11 reviewed multiple renditions of the manuscript, providing suggestions and editing until  
12 all approved the appropriateness for submission.  
13  
14  
15  
16  
17  
18  
19  
20  
21  
22  
23  
24  
25

26 **Funding:** Drs. Flowers and Bérubé received start-up funding from the Faculty of Health  
27 Sciences, University of Ottawa, facilitating the development and future conduct of this  
28 scoping review. Dr. Skoretz holds start-up funding from the Faculty of Medicine's  
29 School of Audiology and Speech Science at the University of British Columbia.  
30  
31  
32  
33  
34  
35

36 **Competing Interests:** None declared  
37

38 **Provenance and Peer Review:** Not commissioned  
39  
40

41 **Open Access:** applicable if accepted  
42  
43  
44  
45  
46  
47  
48  
49  
50  
51  
52  
53  
54  
55  
56  
57  
58  
59  
60

**REFERENCES:**

1. Irvine B, Luo W, León J. Report Summary Congenital Anomalies in Canada 2013: A Perinatal Health Surveillance Report by the Public Health Agency of Canada's Canadian Perinatal Surveillance System. *Health Promot Chronic Dis Prev Can* 2015;35:21-22. doi:10.24095/hpcdp.35.1.04
2. Public Health Agency of Canada. Down Syndrome Surveillance in Canada 2005-2013. [Internet]. 2017 [cited 2018 July 7]. Available from <https://www.canada.ca/en/public-health/services/publications/healthy-living/down-syndrome-surveillance-2005-2013.html>
3. Pavri SF. Demographics of Orofacial Clefts in Canada from 2002 to 2008. *Cleft Palate Craniofac J* 2013;50:224-30. doi:10.1597/10-223.
4. Christensen D, Van Naarden Braun K, Doernberg NS, et al. Prevalence of cerebral palsy, co-occurring autism spectrum disorders, and motor functioning – Autism and Developmental Disabilities Monitoring Network, USA, 2008. *Dev Med Child Neurol* 2013;56:59-65. doi:10.1111/dmcn.12268
5. Statistics Canada. Health Fact Sheets Preterm live births in Canada, 2000 to 2013. [Internet]. 2016 [cited 2017 July 7]. Available from <https://www150.statcan.gc.ca/n1/pub/82-625-x/2016001/article/14675-eng.htm>
6. Black LI, Vahratian A, Hoffman HJ. Communication disorders and use of intervention services among children aged 3–17 years: United States, 2012. NCHS data brief, no 205. Hyattsville, MD: National Center for Health Statistics 2015.
7. Norbury C, Gooch D, Wray C, et al. The impact of nonverbal ability on prevalence and clinical presentation of language disorder: evidence from a population study. *J Child Psychol Psychiatry* 2016;57:1247-57. doi:10.1111/jcpp.12573
8. Tomblin J, Records N, Buckwalter P, et al. Prevalence of specific language impairment in kindergarten children. *J Speech Lang Hear Res* 1997;40:1245-60. doi:10.1044/jslhr.4006.1245
9. Beitchman J, Nair R, Clegg M, et al. Prevalence of Speech and Language Disorders in 5-Year-Old Kindergarten Children in the Ottawa-Carleton Region. *J Speech Hear Disord* 1986;51:98-110. doi:10.1044/jshd.5102.98
10. Campbell TF, Dollaghan CA, Rickette HE, Paradise JL, Feldman HM, Shriberg LD, et al. Risk Factors for Speech Delay of Unknown Origin in 3-Year-Old Children. *Child Dev* 2003;74:346-357. doi:10.1111/1467-8624.7402002

- 1  
2  
3  
4  
5  
6  
7  
8  
9  
10  
11  
12  
13  
14  
15  
16  
17  
18  
19  
20  
21  
22  
23  
24  
25  
26  
27  
28  
29  
30  
31  
32  
33  
34  
35  
36  
37  
38  
39  
40  
41  
42  
43  
44  
45  
46  
47  
48  
49  
50  
51  
52  
53  
54  
55  
56  
57  
58  
59  
60
11. Public Health Agency of Canada. Autism Spectrum Disorder among Children and Youth in Canada 2018. A Report of the National Autism Spectrum Disorder Surveillance System [Internet]. 2018 [cited 2018 July 7]. Available from <https://www.canada.ca/en/public-health/services/publications/diseases-conditions/autism-spectrum-disorder-children-youth-canada-2018.html#a2-7>
12. Morgan L, Wren YE. A Systematic Review of the Literature on Early Vocalizations and Babbling Patterns in Young Children. *Commun Disord Q* 2018;40:3-14. doi:10.1177/1525740118760215
13. AlHammadi FS. Prediction of child language development: A review of literature in early childhood communication disorders. *Lingua* 2017;199:27-35. doi:10.1016/j.lingua.2017.07.007
14. Etchell A, Adhikari A, Weinberg LS, Choo, et al. A systematic literature review of sex differences in childhood language and brain development. *Neuropsychologia* 2018;114:19-31. doi:10.1016/j.neuropsychologia.2018.04.011
15. Fisher EL. A systematic review and meta-analysis of predictors of expressive-language outcomes among late talkers. *Speech Lang Hear Res* 2017;60:2935-48. doi:10.1044/2017\_JSLHR-L-16-0310
16. Matthews D, Biney H, Abbot-Smith, K. Individual differences in Children's pragmatic ability: A review of associations with formal language, social cognition, and executive functions. *Lang Learn Dev* 2018;14:186-223. doi:10.1080/15475441.2018.1455584
17. Stark RE, Rose SN, Benson PJ. Classification of infant vocalization. *Int J Lang Commun Disord* 1978;13:41-7. doi:10.3109/13682827809011324
18. Emde RN, Biringen Z, Clyman RB, et al. The moral self of infancy: Affective core and procedural knowledge. *Dev Rev* 1991;11:251-70. doi:10.1016/0273-2297(91)90013-E
19. Stevenson RD, Allaire JH. The development of normal feeding and swallowing. *Pediatr Clin North Am* 1991;38:1439-1453. doi:10.1016/S0031-3955(16)38229-3
20. Owens RE. Language Development: An Introduction (9<sup>th</sup> ed). Pearson/Allyn and Bacon 2016:1-126.
21. Davies WH, Satter E, Berlin KS, et al. Reconceptualizing feeding and feeding disorders in interpersonal context: The case for a relational disorder. *J Fam Psychol* 2006;20:409-17. doi:10.1037/0893-3200.20.3.409



- 1  
2  
3 22. Koopmans-van Beinum F, Van der Stelt. Early Stages in Infant Speech Development. *Proceedings of the Institute of Phonetic Sciences* 1979;5:30-43.  
4  
5  
6  
7 23. Koopmans-van Beinum F, Van der Stelt JM. Early Stages in the Development of  
8 Speech Movements. In Lndblom B & Zetterström R (Eds.) *Precursors of Early Speech:*  
9 *Proceedings of an international symposium held at the Wenner-Gren Center, Stockholm,*  
10 *September 10-22,1984.* Basingstoke: Macmillan. 1986:37-50.  
11  
12 24. Oller DK, Wieman LA, Doyle WJ, Ross C. Infant babbling and speech. *J Child Lang*  
13 1976;3:1-11. doi:10.1017/S0305000900001276  
14  
15  
16 25. Oller DK. *The Emergence of the Speech Capacity.* Mahwah, NJ: Lawrence Erlbaum  
17 Associates, Publishers 2000. doi: 10.1121/1.1388001  
18  
19 26. Bernhardt M., Stemberger J, Charest M. Intervention for speech production in  
20 children and adolescents: Models of speech production and therapy approaches.  
21 introduction to the issue. *Can J Speech Lang Pathol Audiol* 2010;34:157-67.  
22  
23  
24 27. Munakata Y, McClelland, JL. Connectionist models of development. *Dev Sci*  
25 2003;6:413-29. doi:10.1111/1467-7687.00296  
26  
27 28. Nixon GM, Charbonneau I, Kermack AS, Brouillette RT, McFarland DH.  
28 Respiratory-swallowing interactions during sleep in premature infants at term. *Respir*  
29 *Physiol Neurobiol* 2008;160:76-82. doi:10.1016/j.resp.2007.08.010  
30  
31  
32 29. Paydarfar D, Gilbert RJ, Poppel CS, Nassab PF. Respiratory phase resetting and  
33 airflow changes induced by swallowing in humans. *J Physiol* 1995;483(1):273-288.  
34 doi:10.1113/jphysiol.1995.sp020584  
35  
36  
37 30. Selley WG, Ellis RE, Flack FC, Brooks WA. Coordination of sucking, swallowing  
38 and breathing in the newborn: Its relationship to infant feeding and normal development.  
39 *Int J Lang Commun Disord* 1990;25(3):311-327. doi:10.3109/13682829009011980  
40  
41  
42 31. Rommel N, Veereman G. GERD and Dysphagia. In: Vandenplas Y ed.  
43 *Gastroesophageal Reflux in Children.* Springer International Publishing 2017.  
44 doi:10.1007/978-3-319-60678-1\_10.  
45  
46 32. World Health Organization. International Classification of Diseases for Mortality and  
47 Morbidity Statistics. 11th Revision, Reference Guide. [Internet]. 2018 [cited 2018 23  
48 Nov]. Available from [https://icd.who.int/browse11/l-](https://icd.who.int/browse11/l-m/en#http%3a%2f%2fid.who.int%2fid%2fentity%2f1412387537)  
49 [m/en#http%3a%2f%2fid.who.int%2fid%2fentity%2f1412387537](https://icd.who.int%2fid%2fentity%2f1412387537)  
50  
51  
52 33. Delaney AL, Arvedson JC. Development of swallowing and feeding: Prenatal  
53 through first year of life. *Devel Disabil Res Rev* 2008;14:105-17. doi:10.1002/ddrr.16  
54  
55  
56  
57  
58  
59  
60

- 1  
2  
3 34. Pinker S. Out of the minds of babes. *Science* 1999;283(5398):40-41.  
4 doi:10.1126/science.283.5398.40  
5  
6  
7 35. Shaker CS. Cue-based feeding in the NICU: Using the infant's communication as a  
8 guide. *Neonatal Netw* 2013;32:404-8. doi:10.1891/0730-0832.32.6.404  
9  
10 36. Whetten CH. Cue-based feeding in the NICU. *Nurs Womens Health* 2016;20:507-10.  
11 doi:10.1016/j.nwh.2016.08.006  
12  
13 37. Adams-Chapman I, Bann CM, Vaucher YE, et al. Association between feeding  
14 difficulties and language delay in preterm infants using Bayley scales of infant  
15 development-third edition. *J Pediatr* 2013;163:680-5.e3. doi:10.1016/j.jpeds.2013.03.006  
16  
17 38. Barnevik Olsson M, Carlsson LH, Westerlund J, et al. Autism before diagnosis:  
18 crying, feeding and sleeping problems in the first two years of life. *Acta Paediatr*  
19 2013;102:635-9. doi :10.1111/apa.12229  
20  
21 39. Girard L-, Doyle O, Tremblay RE. Breastfeeding, cognitive and noncognitive  
22 development in early childhood: A population study. *Pediatrics* 2017;139.  
23 doi:10.1542/peds.2016-1848  
24  
25 40. Malas K, Trudeau N, Chagnon M, et al. Feeding-swallowing difficulties in children  
26 later diagnosed with language impairment. *Dev Med Child Neurol* 2015;57:872-9.  
27 doi:10.1111/dmcn.12749  
28  
29 41. Malas K, Trudeau N, Giroux M, et al. Prior history of feeding–swallowing difficulties  
30 in children with language impairment. *Am J Speech Lang Pathol* 2017;26:138-45.  
31 doi:10.1044/2016\_AJSLP-15-0171  
32  
33 42. Palladino RRR, Cunha MC, de Paula Souza LA. Language and eating problems in  
34 children: Co-occurrences or coincidences? *Pro Fono* 2007;19:205-14.  
35  
36 43. Joanne Briggs Institute. Reviewer's Manual 2015: Methodology for JBI Scoping  
37 Reviews. 2015: Joanne Briggs Institute, Australia.  
38 [http://joannabriggs.org/assets/docs/sumari/Reviewers-Manual\\_Methodology-for-JBI-](http://joannabriggs.org/assets/docs/sumari/Reviewers-Manual_Methodology-for-JBI-Scoping-Reviews_2015_v2.pdf)  
39 [Scoping-Reviews\\_2015\\_v2.pdf](http://joannabriggs.org/assets/docs/sumari/Reviewers-Manual_Methodology-for-JBI-Scoping-Reviews_2015_v2.pdf) (accessed 7 Jul 2018).  
40  
41 44. Arksey H, O'Malley L. Scoping studies: Towards a methodological framework. *Int J*  
42 *Soc Res Methodol: Theory Pract* 2005;8:19-32. doi:10.1186/1748-5908-5-69  
43  
44 45. Levac D, Colquhoun H, O'Brien KK. Scoping studies: Advancing the methodology.  
45 *Implement Sci* 2010;5. doi:10.1186/1748-5908-5-69  
46  
47 46. Moher D, Shamseer L, Clarke M, Ghersi D, Liberati A, Petticrew M, et al. Preferred  
48 reporting items for systematic review and meta-analysis protocols (PRISMA-P) 2015  
49 statement. *Syst Rev* 2015;4. doi:10.1186/2046-4053-4-1  
50  
51  
52  
53  
54  
55  
56  
57  
58  
59  
60

- 1  
2  
3 47. Shamseer L, Moher D, Clarke M, Ghersi D, Liberati A, Petticrew M, et al. Preferred  
4 reporting items for systematic review and meta-analysis protocols (prisma-p) 2015:  
5 Elaboration and explanation. *Br Med J (Online)* 2015;349. doi:10.1136/bmj.g7647  
6  
7  
8 48. Bessell A, Hooper L, Shaw WC, Reilly S, Reid J, Glenny AM. Feeding interventions  
9 for growth and development in infants with cleft lip, cleft palate or cleft lip and palate.  
10 *Cochrane Database Syst Rev* 2011;2  
11  
12 49. Morgan AT, Dodrill P, Ward EC. Interventions for oropharyngeal dysphagia in  
13 children with neurological impairment. *Cochrane Database Syst Rev* 2012;10.  
14  
15  
16 50. Psaila K, Foster JP, Richards R, Jeffery HE. Non-nutritive sucking for gastro-  
17 oesophageal reflux disease in preterm and low birth weight infants. *Cochrane Database*  
18 *Syst Rev* 2014;10:1-13. doi:10.1002/14651858.CD009817.pub2  
19  
20  
21 51. Tighe M, Afzal NA, Bevan A, Hayen A, Munro A, Beattie RM. Pharmacological  
22 treatment of children with gastro-oesophageal reflux. *Cochrane Database Syst Rev*  
23 2014;11. doi:10.1002/14651858.CD008550.pub2  
24  
25  
26 52. Brignell A, Song H, Zhu J, Suo C, Lu D, Morgan AT. Communication intervention  
27 for autism spectrum disorders in minimally verbal children. *Cochrane Database Syst Rev*  
28 2016;8. doi:10.1002/14651858.CD012324  
29  
30  
31 53. Law J, Dennis JA, Charlton JJ. Speech and language therapy interventions for  
32 children with primary speech and/or language disorders. *Cochrane Database Syst Rev*  
33 2017;1. doi:10.1002/14651858.CD012490  
34  
35  
36 54. Lee AS-, Gibbon FE. Non-speech oral motor treatment for children with  
37 developmental speech sound disorders. *Cochrane Database Syst Rev* 2015;3.  
38 doi:10.1002/14651858.CD009383.pub2  
39  
40  
41 55. Morgan AT, Vogel AP. A Cochrane review of treatment for childhood apraxia of  
42 speech. *Eur J Phys Rehabil Med* 2009;45:103-110.  
43  
44  
45 56. Desmeules R. Filter to Retrieve Pediatric Articles in the OVID Medline Database.  
46 John W Scott Health Sciences Library, University of Alberta. [Internet]. [cited 2018 Nov  
47 23]. Available from Filter-20to-20Retrieve-20Pediatrics-20Articles-20in-20OVID-  
48 20EMBASE in era.library.ualberta.ca  
49  
50  
51 57. Manca A, Moher D, Cugusi L, Dvir Z, et al. How predatory journals leak into  
52 PubMed. *CMAJ* 2018;190:E1042-E1045. doi:10.1503/cmaj.180154  
53  
54  
55 58. Booth A. Unpacking your literature search toolbox: on search styles and tactics.  
56 *Health Info Libr J* 2008;25:313-7. doi:10.1111/j.1471-1842.2008.00825.x  
57  
58  
59  
60

1  
2  
3 59. Covidence systematic review software, Veritas Health Innovation, Melbourne,  
4 Australia. [www.covidence.org](http://www.covidence.org) (accessed Aug 2018).  
5  
6  
7  
8  
9  
10  
11  
12  
13  
14  
15  
16  
17  
18  
19  
20  
21  
22  
23  
24  
25  
26  
27  
28  
29  
30  
31  
32  
33  
34  
35  
36  
37  
38  
39  
40  
41  
42  
43  
44  
45  
46  
47  
48  
49  
50  
51  
52  
53  
54  
55  
56  
57  
58  
59  
60

For peer review only

# BMJ Open

## Swallowing behaviours and feeding environment in relation to communication development from early infancy to six years of age: A scoping review protocol

|                                 |                                                                                                                                                                                                                                                                                                                                                                                                                                                                                                                                                                                                                                                                                                                                                                        |
|---------------------------------|------------------------------------------------------------------------------------------------------------------------------------------------------------------------------------------------------------------------------------------------------------------------------------------------------------------------------------------------------------------------------------------------------------------------------------------------------------------------------------------------------------------------------------------------------------------------------------------------------------------------------------------------------------------------------------------------------------------------------------------------------------------------|
| Journal:                        | <i>BMJ Open</i>                                                                                                                                                                                                                                                                                                                                                                                                                                                                                                                                                                                                                                                                                                                                                        |
| Manuscript ID                   | bmjopen-2018-028850.R1                                                                                                                                                                                                                                                                                                                                                                                                                                                                                                                                                                                                                                                                                                                                                 |
| Article Type:                   | Protocol                                                                                                                                                                                                                                                                                                                                                                                                                                                                                                                                                                                                                                                                                                                                                               |
| Date Submitted by the Author:   | 25-Jun-2019                                                                                                                                                                                                                                                                                                                                                                                                                                                                                                                                                                                                                                                                                                                                                            |
| Complete List of Authors:       | Flowers, Heather ; University of Ottawa, School of Rehabilitation Sciences, Faculty of Health Sciences; Montfort Hospital, Institut du savoir - A Knowledge Institute<br>Bérubé, Daniel; University of Ottawa, School of Rehabilitation Sciences, Faculty of Health Sciences<br>Ebrahimipour, Mona; University of Ottawa, School of Rehabilitation Sciences, Faculty of Health Sciences; Elisabeth-Bruyere Hospital<br>Perrier, Marie-France; University of Ottawa, School of Rehabilitation Sciences, Faculty of Health Sciences; Children's Hospital of Eastern Ontario<br>Moloci, Sarah; Hopital Montfort<br>Skoretz, Stacey; The University of British Columbia, School of Audiology and Speech Sciences; University of Alberta, Faculty of Medicine and Dentistry |
| <b>Primary Subject Heading</b>: | Paediatrics                                                                                                                                                                                                                                                                                                                                                                                                                                                                                                                                                                                                                                                                                                                                                            |
| Secondary Subject Heading:      | Communication, Rehabilitation medicine                                                                                                                                                                                                                                                                                                                                                                                                                                                                                                                                                                                                                                                                                                                                 |
| Keywords:                       | PAEDIATRICS, REHABILITATION MEDICINE, swallowing, feeding, communication development, Speech pathology < OTOLARYNGOLOGY                                                                                                                                                                                                                                                                                                                                                                                                                                                                                                                                                                                                                                                |
|                                 |                                                                                                                                                                                                                                                                                                                                                                                                                                                                                                                                                                                                                                                                                                                                                                        |

SCHOLARONE™  
Manuscripts

1  
2  
3 **Swallowing behaviours and feeding environment in relation to communication**  
4 **development from early infancy to six years of age: A scoping review protocol**  
5  
6  
7

8  
9 **Corresponding Author:**

10  
11 Heather Leslie Flowers<sup>1-4</sup>  
12 451 Smyth Road, room 3071  
13 Roger Guindon Hall  
14 School of Rehabilitation Sciences  
15 University of Ottawa  
16 Ottawa, ON  
17 K1H 8M5  
18 Canada  
19 Email: [heather.flowers@uottawa.ca](mailto:heather.flowers@uottawa.ca)  
20 Tel : 613-562-5800 ext 8400  
21  
22

23  
24 **Co-authors:**

25  
26 Daniel Bérubé<sup>1</sup>  
27 Mona Ebrahimipour<sup>1,5,6</sup>  
28 Marie-France Perrier<sup>1,7</sup>  
29 Sarah Moloci<sup>8</sup>  
30 Stacey Ann Skoretz<sup>9-11</sup>  
31  
32

- 33 1. School of Rehabilitation Sciences, University of Ottawa, Ottawa, ON, Canada  
34 2. Institut du Savoir – Montfort – A Knowledge Institute, Ottawa, ON, Canada  
35 3. The Ottawa Hospital Research Institute, Ottawa, ON, Canada  
36 4. Toronto General Hospital, University Health Network, Toronto, ON, Canada  
37 5. Department of Speech Therapy, University of Social Welfare and Rehabilitation  
38 Sciences, Tehran, Iran  
39 6. Elisabeth Bruyère Hospital, Ottawa, ON, Canada  
40 7. Children’s Hospital of Eastern Ontario, Ottawa, ON, Canada  
41 8. Montfort Hospital, Ottawa, ON, Canada  
42 9. School of Audiology and Speech Sciences, University of British Columbia,  
43 Vancouver, BC, Canada  
44 10. Department of Critical Care Medicine, University of Alberta, Edmonton, AB, Canada  
45 11. Centre for Heart Lung Innovation, St. Paul’s Hospital, Vancouver, BC, Canada  
46  
47  
48  
49  
50

51 **Word count:** 3560  
52  
53  
54  
55  
56  
57

## ABSTRACT:

**Introduction:** Understanding the influences of early swallowing function and feeding environment on the development of communication will enhance prevention and intervention initiatives for young children. This scoping review will help elucidate key elements affecting the developmental trajectory of communicative systems, typically robust and well-developed by formal school entry. We aim to i) map the current state of the literature in a growing field of interest that has the potential to advance knowledge translation, ii) identify existing gaps, and iii) provide research direction for future investigations surrounding feeding-swallowing functions and environment that support or forestall communication development in young children.

**Methods and analysis:** We are proposing a scoping review to identify the breadth and depth of the existing literature regarding swallowing-feeding functions and environment relative to the onset and progression of communicative behaviours from infancy to six (<6;0) years of age. Our protocol delineates rigorous methods according to Arskey and O'Malley's framework and includes elaborations by Levac and colleagues. We will search the literature based on 10 databases 17 peer-reviewed journals, 4 conference proceedings, and 6 grey literature sources. Two authors will independently screen abstracts and review full articles, remaining blind to each other's results. A third author will contribute to resolving any discrepant results from both the abstract and article review. Subsequently, we will extract data and chart information from accepted articles using a pre-established data collection form. We will stratify results according to healthy versus impaired swallowing-feeding functions and communication development.

**Ethics and dissemination:** Our scoping review does not require ethical approval. We will disseminate our final study results through international and national conference presentations, publication in a peer-reviewed journal, and knowledge translation activities with stakeholders.

## STRENGTHS AND LIMITATIONS OF THE STUDY:

- A key strength includes a first and comprehensive literature mapping for research on the influence of early swallowing-feeding behaviours and environment on communication development
- A second strength includes a rigorous search design involving multiple sources, such as databases, journals, conference proceedings, and the grey literature
- An inherent limitation of our scoping review is that we will not conduct quality appraisal for individual articles given anticipated breadth of results and research designs
- A second limitation is that we did not include nutritional factors alongside feeding as potential mediators of optimal development of communicative behaviours. The breadth of the review protocol is extensive and cannot feasibly accommodate infant or maternal nutritional inquiry

**BACKGROUND:**

There has been growing interest in the effects of swallowing and feeding functions on the development of communicative systems in young children. Research is necessary to understand the complexity of influences that may foster optimal development and conversely forestall delays, especially in the wake of increasingly prevalent communication disorders. Whether or not children incur communication disorders via elusive causes or predisposing conditions, a high proportion of newborn babies will develop a communication disorder. They often remain vulnerable from birth through to school entry (generally before the age of six), especially if diagnosis is delayed or early interventions are lacking.[1] Various prenatal, perinatal, or postnatal congenital abnormalities or conditions, including syndromes, cerebral palsy, and premature birth, may predispose children to impaired communication development. Currently, congenital syndromes affect about four percent of Canadian babies.[2] In particular, the birth prevalence of Down syndrome is 0.16 percent[3] and orofacial clefts are evidenced in 0.13 percent of live births.[4] Even more prevalent, cerebral palsy ranges from 0.31 to 0.36 percent of eight year old children in the USA.[5] Far exceeding the prevalence of other conditions, prematurity is currently estimated at 8 percent of all births,[6] and ensuing difficulties may persist throughout childhood.

In fact, eight percent of American children aged three to 17 years has a speech, language, voice, or swallowing disorder.[7] More specifically, a recent population study demonstrated a frequency of language disorders by entry to mainstream schooling in 10 percent of children.[8] Close to one-third of the sample had a language disorder of unknown cause,[8] which is often attributable to specific language impairment.[9]



1  
2  
3 Similarly, the prevalence of language impairment in Canadian kindergarteners is about  
4 eight percent.[10] Concerning speech acquisition, approximately 15 percent of three-year  
5 old and four percent of six-year old children have a speech sound disorder.[11] Speech  
6 and/or language impairments often co-occur, affecting over 10 percent of kindergarten  
7 children.[10] They may be also present in children with social communication  
8 impairments, such as autism spectrum disorder, which affects one and a half percent of  
9 Canadian children currently.[12]

10  
11  
12  
13  
14  
15  
16  
17  
18  
19  
20  
21  
22  
23  
24  
25  
26  
27  
28  
29  
30  
31  
32  
33  
34  
35  
36  
37  
38  
39  
40  
41  
42  
43  
44  
45  
46  
47  
48  
49  
50  
51  
52  
53  
54  
55  
56  
57  
58  
59  
60

Despite good epidemiological information and a long history of research on speech and language development in the preschool years,[13-17] a significant gap exists concerning knowledge of the earliest precursors to communication.[13] There is, however, emerging evidence for synchrony and congruence between maternal vocalisations and fetal behaviours.[18] In particular, the fetus is preferentially sensitive to particular types of maternal linguistic input and may even mirror associated gestural oral behaviours (such as mouth opening).[19] Early after birth, synchronous mother-infant vocal behaviours continue to manifest.[20] Vocalizations of the newborn infant include cries, vegetative sounds, and comfort sounds such as cooing, as described in Stark and her colleague's (1978)[21] seminal study, all occurring well before the onset of reduplicated babbling.[13] Of note, a recent study underscored differences in maternal response to early speech-like vocalizations (protophones) compared to infant cries.[20] That is, mothers more frequently engaged in verbal turn-taking when infants produced protophones compared to cries.[20] Cooing is an early speech-like behaviour, occurring as early as one month of age,[21] and it may well be a hallmark indicator to the healthy

1  
2  
3 progression of higher order speech and communicative systems because of its association  
4  
5 with positive affect and relational interactions.[22]  
6

7  
8 A body of evidence suggests that early positive attachment and interactive  
9  
10 experiences between mothers and babies facilitate affective, cognitive, and  
11  
12 communication development.[23] Over the long term, children demonstrate improved  
13  
14 social-emotional[24,25] and cognitive[26] development when their mothers are  
15  
16 emotionally available,[24,26] provide skin-to-skin contact,[25] and/or provide verbal  
17  
18 stimulation[26] in early infancy. Likewise, intact early infant neuroregulation,  
19  
20 particularly attention (a precursor to interactive engagement), predicts good social  
21  
22 communication outcomes by school entry.[27]  
23  
24  
25

26 Notwithstanding, the nature and potential range of early facilitators and associated  
27  
28 trajectory of infant responses that converge for the healthy or optimal development of  
29  
30 communication, particularly the onset of joint attention,[28] remain elusive. Given the  
31  
32 highly responsive and largely reflexive behaviours in the neonatal period, young infants  
33  
34 are difficult to evaluate and monitor in a natural setting. Consequently, there remains a  
35  
36 paucity of literature on very early onset of vocalizations and progression toward the  
37  
38 development of symbolic communication despite evidence for early maternal verbal  
39  
40 contingencies following infant vocalizations[20,29] and interactive cues such as eye-gaze  
41  
42 patterns.[29] An ideal naturalistic early context for understanding communication  
43  
44 development includes physiologically-driven periods when infants are alert, most notably  
45  
46 prior to and during feeding sequences. For example, early vocalizations of contentment  
47  
48 may be inextricably linked to the feeding context.[30] Interestingly, infants remain by  
49  
50 and large dependent for feeding, until just about the time when symbolic communication  
51  
52  
53  
54  
55  
56  
57  
58  
59  
60

1  
2  
3 and joint attention emerge (8 to 12 months).[31] Consequently, the feeding environment  
4  
5 can promote optimal linguistic exposure and interactions, facilitating development of the  
6  
7 auditory system and various basic motor functions of the vocal tract.[32]  
8  
9

10 Various theoretical premises exist regarding the development of communication:  
11  
12 i) one revolving around the tightly-coordinated and integrative physiological  
13  
14 development of the respiratory and vocal/articulatory systems,[33,34] ii) another  
15  
16 particularly centered on intrinsic innate developmental stages for speech and language  
17  
18 acquisition,[35,36] and iii) a third pertaining to a connectionist framework for speech  
19  
20 production and/or processing alongside learning demands,[37] dependent on capacity for  
21  
22 resource allocation.[38] By extension, a connectionist model could intuitively include  
23  
24 physiological integrity as necessary for higher-level resource allocation, whereby  
25  
26 excessive demands or dysfunction would preclude optimal activation of complex  
27  
28 behaviours and cognitive processing. Conversely, physiological integrity coupled with  
29  
30 environmental facilitators would permit the necessary resource allocation for the optimal  
31  
32 development of integrated networks for communicative systems, ensuring appropriate  
33  
34 stage to stage developmental progression.  
35  
36  
37  
38  
39

40 To illustrate, from a physiological standpoint, both respiration and swallowing are  
41  
42 primordial life-sustaining functions, and they are inextricably linked and tightly  
43  
44 coordinated behaviours.[39-41] Consequently, integrity of swallowing depends upon  
45  
46 adequate respiratory functions and together they provide the physiological and  
47  
48 neurological basis for developing voice and speech functions.[33,34] Physiological  
49  
50 integrity of swallowing coupled with a facilitative feeding environment[32] may well  
51  
52 optimize connections and prime the development of neural networks for communication.  
53  
54  
55  
56  
57  
58  
59  
60

1  
2  
3 Conversely, detriment to swallowing functions can incur disease and grossly compromise  
4 physiological integrity of the respiratory and auditory systems. Examples include  
5 increased risk of secondary respiratory infections[42] and otitis media.[43,44]. There is a  
6 need to collect additional knowledge about swallowing/feeding and speech/language  
7 relationships, including mediation by the auditory system[45] to help us improve our  
8 current understanding of healthy versus disordered development of communication.  
9 Specifically, we want to improve the processes of early detection, evaluation, and  
10 intervention for swallowing/feeding and associated communicative functions in an  
11 integrated manner.  
12  
13  
14  
15  
16  
17  
18  
19  
20  
21  
22  
23  
24  
25

### 26 **Rationale:**

27  
28 Identifying relationships between early physiological functions (such as feeding and  
29 swallowing) and communication (from speech-like behaviours such as cooing to  
30 phonological development for meaningful word production and language use in  
31 discourse) will help us improve our understanding of the development of communication.  
32 We need to consider these relationships starting in early infancy because the feeding  
33 context has great potential as a facilitative environment for social interactions.  
34 Nevertheless, problems with swallowing function and/or suboptimal feeding environment  
35 may have a grossly prohibitive effect on optimal and healthy development of  
36 communicative systems. We still need a comprehensive understanding of precursors and  
37 determinants longitudinally from birth to the age of six, when most children begin formal  
38 schooling.  
39  
40  
41  
42  
43  
44  
45  
46  
47  
48  
49  
50  
51  
52  
53  
54  
55  
56  
57  
58  
59  
60

## Objectives:

The primary objective of our scoping review is to provide an overview of the literature considering the association between swallowing physiology and feeding environment and the development of communicative functions, whether healthy or disordered. The specific objectives include: 1) identifying the number and design of articles over time, 2) mapping sample characteristics and study themes in the existing literature, and 3) identifying gaps in knowledge pertaining to the contribution of swallowing function and feeding environment to the development of communicative systems in infants and young children.

## METHODS AND ANALYSIS

### Operational Definitions

We have defined swallowing to include oropharyngeal and/or esophageal stages[46] involving anatomical, neurological (e.g. coordinated respiratory/swallowing behaviours), and/or physiological functions. Pediatric feeding includes i) interest in feeding[47] and consequent environmental engagement, ii) behavioural manifestations of dietary preferences, and/or iii) progression through developmentally appropriate food and/or liquid consistencies and type.[48] As such, feeding does not include nutritional aspects of intake and/or diet, such as adequacy of macro or micronutrients. Hereafter, the term “environment” will refer to external stimuli linked to the feeding process and related context. Consequently, elements could include feeding mode, accompanying auditory or visual stimuli, location (e.g., intensive care unit, home, an incubator), and social interactions (e.g., verbal and tactile).

1  
2  
3           Communication refers to the exchange of information, ideas, needs, and desires  
4  
5 between at least two persons.[31] It involves both linguistic and paralinguistic codes,[31]  
6  
7 whereby methods of transmission include speech, intonation, gestures, and body  
8  
9 language.[31] Examples of earliest behavioural manifestations may include first words or  
10  
11 manual signs, presenting in children as young as 8 months,[31] rapidly increasing in  
12  
13 complexity.[49] For the purpose of this scoping review, the definition of communication  
14  
15 encapsulates the entire developmental progression from earliest precursors in the  
16  
17 newborn infant to the use of near adult-like constructs by school entry.[31]  
18  
19

20  
21           Therefore, we need to appreciate factors involving swallowing physiology and  
22  
23 feeding relative to the onset of pre-linguistic vocalisations and progression towards a  
24  
25 highly complex communicative system. Such an understanding will help identify early  
26  
27 facilitators or prognostic indicators of delay in the development of communication,  
28  
29 whether speech, language, or social communication (or a combination therein). A recent  
30  
31 shift in culture in health-care settings has already manifested, whereby early infant  
32  
33 behaviours (such as vocalizations) are understood to be cues that communicate a need  
34  
35 and warrant a social interactive response.[50,51] Hence, recommended feeding practices  
36  
37 follow from observing infant cues for readiness,[52,53] rather than from assessing oral  
38  
39 motor abilities (such as non-nutritive sucking) or from documenting quantity of ingested  
40  
41 feeds.[53] Accordingly, there has been a recent increase in attention to pediatric feeding-  
42  
43 swallowing disorders and their relationship to communication development.[54-59]  
44  
45 Research investigations involving swallowing behaviours and feeding are badly needed  
46  
47 to guide preventative and clinical treatment initiatives to promote the healthy  
48  
49 development of communication from infancy to school entry.  
50  
51  
52  
53  
54  
55  
56  
57  
58  
59  
60

## Framework

Given the breath of our topic, we chose to conduct a scoping review of the literature that will guide knowledge translation, identify gaps in the literature, and inform future research investigations from an emerging evidence base.[60] Our scoping review follows Arskey and O'Malley's framework involving six stages,[61] including elaborations, such a clearly articulated reason and scope of inquiry as well as a transparent and replicable approach to study selection.[62] We have applied the PRISMA-P reporting checklist[63,64] as a guide for the process of literature appraisal and for reporting results (Supplementary Table 1).

## Patient and Public Involvement

Neither patients nor the public was involved in the development of the current scoping review protocol.

## Stage 1: identifying the research questions

We have developed a single broad research question to inform our search strategy and to derive key domains for our results. We seek to understand the foundational underpinnings of the early development of communication in relation to its inherent physiological and environmental precursors surrounding early swallowing and feeding behaviours. The overarching broad question that our review addresses is:

“What early feeding/swallowing factors are associated with communication development from birth to six (<6;0) years of age?”

1  
2  
3 Our line of inquiry includes early child development in both health and congenital or  
4 acquired diseases/disorders. Consequently, our review will facilitate an appreciation of  
5 swallowing-feeding factors that relate to the development of communication within an  
6 epidemiological framework. Underlying secondary questions relate to swallowing  
7 physiology and the feeding environment more specifically. The development of our  
8 secondary questions results from an iterative process, whereby reformulations of the  
9 questions posed *a priori* (i.e, those identified herein) may result and/or new questions  
10 may arise. Our secondary questions currently include:  
11  
12  
13  
14  
15  
16  
17  
18  
19  
20  
21

- 22 i. What underlying congenital problems (e.g., cerebral palsy,  
23 cardiac/respiratory/gastrointestinal anatomical defects, neurological syndromes,  
24 prematurity, transient birth-related distress) impact swallowing-feeding integrity  
25 and the development of communicative functions?  
26  
27  
28  
29  
30
- 31 ii. What swallowing-related impairments (e.g., poor respiratory function, reflux,  
32 weak neonatal latch/sucking behaviours, otitis media) compromise or delay the  
33 onset of communicative functions?  
34  
35  
36  
37
- 38 iii. How do feeding environments alter the onset and course of development of  
39 communicative functions?  
40  
41  
42
  - 43 a. feeding mode (breast, bottle, combination feeding, enteral feeding)
  - 44  
45 b. setting (neonatal intensive care unit stay, hospital stay, interventions such  
46 as incubation for phototherapy)
  - 47  
48 c. interactive constructs (quality and quantity of feeding-related caregiver  
49 verbal and/or tactile interactions)
  - 50  
51  
52  
53  
54  
55  
56  
57  
58  
59  
60



## Stage 2: identifying relevant studies

The search strategy for Medline was developed in three steps by the first (HF) and third authors (ME) with input by the final author (SAS) through ongoing consultation with a research librarian. First, we undertook a consultative process, whereby we analysed and reviewed all MeSH terms associated with communicative functions and feeding/swallowing behaviours multiple times to maximize specificity while retaining the necessary scope of inquiry. Subsequently, the first and third authors chose MeSH terms for explosion if all subordinate terms were truly relevant to the content area and research questions. Second, review of other relevant systematic or scoping reviews revealed additional possibilities for MeSH terms and context-dependent terms (e.g., title, abstract, and key words) in the areas of swallowing-feeding[65-68] and communication[69-72]. The two authors (HF and ME) developing the search strategy selected terms for a pediatric population from a published filter,[73] identified by the research librarian, rather than limit the search within Medline. Finally, we developed additional context-dependent terms that we felt were not be captured from the previous two steps based on our expert knowledge of the fields of swallowing and communicative sciences. The research librarian then confirmed the integrity of the terms and search strategy (Table 1) and provided consultation for additional databases to search.

We selected nine additional databases to search based on adaptations of the Medline search terms (Table 2). We did not include PubMed as part of the search, given the possibility of its referencing predatory journals.[74] We consider our set of selected databases sufficient to capture potentially-relevant PubMed citations. We will not apply date or language limits on the searches to the extent possible. That is, we will

1  
2  
3 accommodate languages that we can read (including at least English, French, German,  
4  
5 Italian, Persian, and Spanish) and seek translations for other languages (if possible) from  
6  
7 colleagues and contacts within our scientific communities. All study designs are of  
8  
9 interest, including case reports, case series, qualitative, cohort, case-control, and quasi-  
10  
11 experimental studies, as well as randomised controlled trials.  
12  
13

14  
15 Further, we identified additional sources most relevant to the content of the  
16  
17 scoping review and based on feasibility of search conduct. We will apply the same article  
18  
19 inclusion criteria and determine search terms accordingly. Selections include 17 journals,  
20  
21 4 conference proceedings, and 6 grey literature sources (Table 2). The research librarian  
22  
23 assisted with determining grey literature sources. We will search all sources  
24  
25 electronically from the first date of their online availability. Finally, we will review the  
26  
27 reference lists and citations of selected articles through Google Scholar using a process of  
28  
29 forward and backward chaining.[75] Our intent is to complete all searches within six  
30  
31 months of the publication of the current scoping review protocol.  
32  
33  
34  
35  
36  
37

38 Table 1. Medline search strategy  
39  
40

| Item | Term Set                                     | Area       |
|------|----------------------------------------------|------------|
| 1    | exp Deglutition/                             | swallowing |
| 2    | exp Gastroesophageal Reflux/                 | swallowing |
| 3    | Deglutition disorders/                       | swallowing |
| 4    | "Feeding and Eating Disorders of Childhood"/ | swallowing |
| 5    | Breast feeding/                              | swallowing |
| 6    | Bottle Feeding/                              | swallowing |
| 7    | Feeding Methods/                             | swallowing |
| 8    | Enteral Nutrition/                           | swallowing |
| 9    | Parenteral Nutrition/                        | swallowing |
| 10   | Kangaroo-Mother Care Method/                 | swallowing |
| 11   | Pacifiers/                                   | swallowing |
| 12   | sucking behaviors/                           | swallowing |

|    |                                                                                                                                                                                                                                                                                                                                                                                                                                                                      |            |
|----|----------------------------------------------------------------------------------------------------------------------------------------------------------------------------------------------------------------------------------------------------------------------------------------------------------------------------------------------------------------------------------------------------------------------------------------------------------------------|------------|
| 13 | ((enteral or tube or gastric) adj (feed\$)).ti,ab,kw.                                                                                                                                                                                                                                                                                                                                                                                                                | swallowing |
| 14 | ((deglut\$ or feed\$ or swallow\$ or feed\$-swallow\$) adj3 (difficult\$ or disorder\$ or abnormal\$ or delay\$ or dysfunction\$ or impair\$ or problem\$ or disabil\$ or disabl\$ or deficit\$)) .ti,ab,kw.                                                                                                                                                                                                                                                         | swallowing |
| 15 | ((deglut\$ or feed\$ or swallow\$ or feed\$-swallow\$) adj3 (behavior or develop\$ or neurodevelop\$ or matur\$ or function\$)) .ti,ab,kw.                                                                                                                                                                                                                                                                                                                           | swallowing |
| 16 | (dysphag\$).ti,ab,kw.                                                                                                                                                                                                                                                                                                                                                                                                                                                | swallowing |
| 17 | ((bottle fe\$) or (bottlefe\$) or (breast fe\$) or (breastfe\$) or (feeding mode) or (feeding methods)).ti,ab,kw.                                                                                                                                                                                                                                                                                                                                                    | swallowing |
| 18 | ((gastroesophageal or gastro-esophageal or infantile or gastric) adj3 (reflux or regurgitat\$)).ti,ab,kw.                                                                                                                                                                                                                                                                                                                                                            | swallowing |
| 19 | exp Speech/                                                                                                                                                                                                                                                                                                                                                                                                                                                          | comm       |
| 20 | exp Speech disorders/                                                                                                                                                                                                                                                                                                                                                                                                                                                | comm       |
| 21 | exp Language development disorders/                                                                                                                                                                                                                                                                                                                                                                                                                                  | comm       |
| 22 | exp Child language/                                                                                                                                                                                                                                                                                                                                                                                                                                                  | comm       |
| 23 | Speech sound disorder/                                                                                                                                                                                                                                                                                                                                                                                                                                               | comm       |
| 24 | Verbal behavior/                                                                                                                                                                                                                                                                                                                                                                                                                                                     | comm       |
| 25 | Manual communication/                                                                                                                                                                                                                                                                                                                                                                                                                                                | comm       |
| 26 | Communication disorders/                                                                                                                                                                                                                                                                                                                                                                                                                                             | comm       |
| 27 | Social communication disorder/                                                                                                                                                                                                                                                                                                                                                                                                                                       | comm       |
| 28 | Autism Spectrum Disorder/                                                                                                                                                                                                                                                                                                                                                                                                                                            | comm       |
| 29 | Language disorders/                                                                                                                                                                                                                                                                                                                                                                                                                                                  | comm       |
| 30 | Language Development/                                                                                                                                                                                                                                                                                                                                                                                                                                                | comm       |
| 31 | ((speech or oromotor or "oral motor" or verbal\$ or oro-motor or orofacial or oro-facial or "oral facial") adj3 (aprax\$ or dysprax\$ or prax\$)).ti,ab,kw.                                                                                                                                                                                                                                                                                                          | comm       |
| 32 | ((speech or speak\$ or oral or language or verbal\$ or communication or voice or vocal\$ or babbl\$ or coo\$ or "oral motor" or oromotor or oro-motor or orofacial or oro-facial or "oral facial" or oralfacial or articulat\$ or phonetic\$ or phonologic\$ or phonemic\$ or pre-linguistic or prelinguistic) adj3 (difficult\$ or disorder\$ or abnormal\$ or delay\$ or dysfunction\$ or impair\$ or problem\$ or disabil\$ or disabl\$ or deficit\$)) .ti,ab,kw. | comm       |
| 33 | ((speech or speak\$ or oral or language or verbal\$ or communication or voice or vocal\$ or babbl\$ or coo\$ or "oral motor" or oromotor or oro-motor or orofacial or oro-facial or "oral facial" or oralfacial or articulat\$ or phonetic\$ or phonologic\$ or phonemic\$ or pre-linguistic or prelinguistic) adj3 (behavior or develop\$ or neurodevelop\$ or matur\$ or acqui\$)) .ti,ab,kw.                                                                      | comm       |
| 34 | exp child/                                                                                                                                                                                                                                                                                                                                                                                                                                                           | population |
| 35 | exp infant/                                                                                                                                                                                                                                                                                                                                                                                                                                                          | population |
| 36 | adolescent/                                                                                                                                                                                                                                                                                                                                                                                                                                                          | population |

|    |                                                                                                                                                                                                                                                                                                                                                                                                                                      |            |
|----|--------------------------------------------------------------------------------------------------------------------------------------------------------------------------------------------------------------------------------------------------------------------------------------------------------------------------------------------------------------------------------------------------------------------------------------|------------|
| 37 | (pediatric* or paediatric* or child* or newborn* or infan* or baby or babies or neonat* or pre-term or preterm* or premature birth* or NICU or preschool* or pre-school* or kindergarten* or kindergarden* or elementary school* or nursery school* or schoolchild* or toddler* or boy or boys or girl* or middle school* or pubescen* or jevenile* or teen* or youth* or high school* or adolesc* or pre-pubesc* or prepubesc*).mp. | population |
|----|--------------------------------------------------------------------------------------------------------------------------------------------------------------------------------------------------------------------------------------------------------------------------------------------------------------------------------------------------------------------------------------------------------------------------------------|------------|

Table 2. Complete list of search sources including databases, journals, conference proceedings, and grey literature

| Literature Type        | Sources                                                                                                                                                                                                                                                                                                                                                                                                                                                                                                                                                                                                                                                                                                                                                                                                        |
|------------------------|----------------------------------------------------------------------------------------------------------------------------------------------------------------------------------------------------------------------------------------------------------------------------------------------------------------------------------------------------------------------------------------------------------------------------------------------------------------------------------------------------------------------------------------------------------------------------------------------------------------------------------------------------------------------------------------------------------------------------------------------------------------------------------------------------------------|
| Databases:             | <ul style="list-style-type: none"> <li>- AMED</li> <li>- CINHAL</li> <li>- Education Source</li> <li>- Embase</li> <li>- ERIC</li> <li>- Linguistics and Language Behaviour Abstracts</li> <li>- Medline</li> <li>- PsycInfo</li> <li>- Scopus</li> <li>- Web of Science</li> </ul>                                                                                                                                                                                                                                                                                                                                                                                                                                                                                                                            |
| Journals:              | <ul style="list-style-type: none"> <li>- American Journal of Speech-Language Pathology</li> <li>- Canadian Journal of Speech-Language Pathology</li> <li>- Child Development</li> <li>- Clinical Linguistics and Phonetics</li> <li>- Developmental Medicine and Child Neurology</li> <li>- Dysphagia</li> <li>- Gastroenterology</li> <li>- Infancy</li> <li>- International Journal of Behavioral Development</li> <li>- International Journal of Speech-Language Pathology</li> <li>- Journal of Child Language</li> <li>- Journal of Communication Disorders</li> <li>- Journal of Pediatric Gastroenterology and Nutrition</li> <li>- Journal of Pediatrics</li> <li>- Journal of Speech, Language, and Hearing Research</li> <li>- Nature</li> <li>- The American Journal of Gastroenterology</li> </ul> |
| Conference Proceedings | <ul style="list-style-type: none"> <li>- ASHA Conference</li> <li>- Dysphagia Research Society</li> </ul>                                                                                                                                                                                                                                                                                                                                                                                                                                                                                                                                                                                                                                                                                                      |

|                  |                                                                                                                                                                                                                                                                                                                   |
|------------------|-------------------------------------------------------------------------------------------------------------------------------------------------------------------------------------------------------------------------------------------------------------------------------------------------------------------|
|                  | <ul style="list-style-type: none"> <li>- International Conference on Speech and Language Development</li> <li>- World pediatrics</li> </ul>                                                                                                                                                                       |
| Grey Literature: | <ul style="list-style-type: none"> <li>- Networked Digital Library of Theses and Dissertations</li> <li>- Open Access Theses and Dissertations</li> <li>- Open Grey</li> <li>- Proquest Dissertations and Theses Global</li> <li>- Ontario Public Health Libraries Association</li> <li>- Grey Matters</li> </ul> |

### Stage 3: selecting studies

We will compile and store all citations using Covidence[76] and Microsoft Excel.

Following elimination of duplicates and citations without abstracts, we will review the remaining abstracts and articles in a two-step process. Two independent reviewers will code the abstracts for potential inclusion or exclusion (Table 3). Coding criteria are purposefully open-ended for abstract review to permit selection of all those potentially relevant for full article retrieval. Additionally, codes are hierarchical, such that if code 1 is relevant, and the abstract therefore deemed ineligible, the remaining codes are not applicable. Subsequently, the two abstract reviewers will discuss and resolve discrepancies by consensus, requesting input from a third reviewer for consensus deliberations. All abstracts not assigned an exclusion code will be accepted for full review.

The same process will apply to full article review to determine final articles for inclusion. That is, two reviewers, blind to each other's evaluations, will independently assess all full articles, determining eligibility for inclusion according to more stringent and hierarchically-coded criteria (Table 3). Any articles written in languages outside of

those understood by the two reviewers will undergo translation (if possible) for key methodological content to enable coding. Coding criteria for the full article review will be more stringent than for the abstract review, since all pertinent information will be available and reviewers will make a final decision about article selection. Where discrepancies exist, the two reviewers engage in discussion to achieve consensus regarding inclusion or exclusion. In the event of difficult resolution, a third reviewer will assist in consensus deliberations. That is, all three reviewers will revisit the article in a process of reiterative evaluation to determine final inclusion or exclusion of the article. All codes and final decisions for inclusion or exclusion from both abstract and full article reviews will be entered into the Excel datasheet.

Articles without exclusion codes will be accepted for the scoping review. Accepted articles that initially required translation will undergo a second review (if possible) by the same translator and/or a different translator to ensure that the appropriate content is available for data extraction and charting.

Table 3. Proposed coding categories for abstract and full article review

| Step 1 - Exclude if abstract:                                                                                 | Step 2 – Exclude if full article:                                                                             |
|---------------------------------------------------------------------------------------------------------------|---------------------------------------------------------------------------------------------------------------|
| 1) is clearly a review, commentary, or opinion                                                                | 1) is clearly a review, commentary, or opinion                                                                |
| 2) clearly has only an adult sample ( $\geq 18$ years of age)                                                 | 2) has a sample exclusively outside desired age range ( $\geq 6$ years of age)                                |
| 3) swallowing/feeding context outside operational definition (i.e. relates exclusively to nutritional intake) | 3) swallowing/feeding context outside operational definition (i.e. relates exclusively to nutritional intake) |
| 4) outcomes relating to communication or other aspects of child development (motor, cognitive) clearly absent | 4) outcomes relating to communication clearly absent                                                          |

|                                                   |                                                                                         |
|---------------------------------------------------|-----------------------------------------------------------------------------------------|
| 5) n/a                                            | 5) outcomes relating to swallowing/feeding and communication development clearly absent |
| 6) clearly involves same data as another abstract | 6) clearly involves same data as another article                                        |
| Otherwise accept for full article retrieval       | Otherwise accept for scoping review                                                     |

#### Stage 4: charting the data

Multiple reviewers will be responsible for collecting data, each from a proportion of the articles, followed by independent verification of all data by research personnel. Data collection will involve documenting key characteristics and variables of interest for each article (Table 4) and recording them in a database for storage and analysis. All reviewers collecting and charting data will be responsible for ongoing communication about emerging themes or domains of inquiry that could alter and enhance data collection procedures.

Table 4: Basic study characteristics for extraction from each accepted article.

| Categories                | Characteristics                                                                                                                                                                                                                                                                                                                                                          |
|---------------------------|--------------------------------------------------------------------------------------------------------------------------------------------------------------------------------------------------------------------------------------------------------------------------------------------------------------------------------------------------------------------------|
| 1) Article details        | Article details <ul style="list-style-type: none"> <li>- year of publication</li> <li>- document type (peer-reviewed journal article, thesis, government document, conference proceeding or published abstract)</li> <li>- location of study (country)</li> </ul>                                                                                                        |
| 2) Study details          | Study details <ul style="list-style-type: none"> <li>- design (cohort, case-series, RCT, case study, case series, qualitative)</li> <li>- time frame (cross-sectional, longitudinal)</li> <li>- setting (hospital, home)</li> <li>- population (children with typical communication development, children with disordered/atypical communication development)</li> </ul> |
| 3) Sample characteristics | Sample characteristics <ul style="list-style-type: none"> <li>- sample size</li> </ul>                                                                                                                                                                                                                                                                                   |

|                                 |                                                                                                                                                                                                                                                               |
|---------------------------------|---------------------------------------------------------------------------------------------------------------------------------------------------------------------------------------------------------------------------------------------------------------|
|                                 | <ul style="list-style-type: none"> <li>- groups</li> <li>- age range</li> <li>- sex/gender</li> <li>- ethnicity</li> <li>- language(s) used</li> <li>- etiology (if applicable)</li> <li>- comorbidities (if applicable)</li> <li>- hearing status</li> </ul> |
| 4) Feeding/Swallowing variables | Feeding/swallowing <ul style="list-style-type: none"> <li>- physiology and behaviours</li> <li>- environment</li> <li>- modes</li> </ul>                                                                                                                      |
| 5) Communication outcomes       | Communication development <ul style="list-style-type: none"> <li>- speech (early vocalizations, babbling, protowords, single word production, multiword production)</li> <li>- language (content, form, use)</li> <li>- gestural behaviours</li> </ul>        |
| 5) Main findings of study       | Trends<br>Effects                                                                                                                                                                                                                                             |
| 6) Data analyses                | Type<br>Rigour                                                                                                                                                                                                                                                |
| 7) Themes/domains of study      | Barriers to communication development<br>Facilitators to communication development                                                                                                                                                                            |
| 8) Study limitations            | Design<br>Outcomes<br>Generalizations                                                                                                                                                                                                                         |
| 9) Pertinence[43]               | Clinical practice<br>Policy<br>Research                                                                                                                                                                                                                       |

### Stage 5: collating, summarizing, and reporting the results

Data from stage 4 will be summarized to map the emergence and breadth of literature over time for the primary objective. Subsequently, we will stratify the findings according to healthy versus impaired development. Various forms of data presentation will include tables, line graphs (for chronological information), histograms, and/or pie charts. To illustrate, we will tabulate study characteristics according to design, population, setting,



1  
2  
3 and pertinence for policy, clinical practice, or research. Similarly, we will visually  
4 represent information pertaining to swallowing-feeding functions and domains of  
5 communication development in charts. Where available, we will describe themes that  
6 arise from our review, including barriers and facilitators to the development of  
7 communicative functions in young children. We will not include quality or rigour of  
8 specific analyses in the scoping review, because the intent is to obtain a sense of the  
9 extent of the literature in the area rather than appraise individual articles.  
10  
11  
12  
13  
14  
15  
16  
17  
18

19 Our scoping review will therefore provide a first overview of trends and breadth  
20 for an emerging body of literature. Most important, we will identify gaps in the current  
21 knowledge base and provide guidance for the prevention and treatment of potential  
22 communication impairments beginning in early infancy.  
23  
24  
25  
26  
27  
28  
29

### 30 **Stage 6: optional consultation exercise**

31 We intend to seek input and consultation from caregivers and practitioners once we have  
32 compiled and mapped the results of our full scoping review. We hope that such  
33 consultation may elucidate gaps that were otherwise not salient to us and subsequently  
34 render our knowledge translation endeavours more feasible and accessible to  
35 stakeholders.  
36  
37  
38  
39  
40  
41  
42  
43  
44  
45

### 46 **ETHICS AND DISSEMINATION**

47 Following completion of all stages of scoping review, findings will be disseminated via  
48 local and international conference presentations and submission to a peer-reviewed  
49 journal. Knowledge translation activities will then include development of accessible  
50 materials for end-users, such as parents, infant caregivers, and clinicians from various  
51  
52  
53  
54  
55  
56  
57  
58  
59  
60

1  
2  
3 fields of professional practice, so that they may understand and advocate best practice for  
4  
5 communicative development in children. In addition, we will share our findings with  
6  
7 policy-making organizations and other stakeholders, such as the Canadian Child and  
8  
9 Youth Health Coalition and the Paediatric International Patient Safety and Quality  
10  
11 Collaborative.  
12  
13

14  
15  
16 **Acknowledgments/Contributors:** The authors acknowledge Marie-Cécile Domecq from  
17  
18 the Health Sciences Library, Faculty of Health Sciences, University of Ottawa, for her  
19  
20 advice and availability for consultation during the development of the current scoping  
21  
22 review protocol.  
23  
24

25  
26  
27 **Contributors:** All co-authors provided meaningful and unique contributions to the  
28  
29 development, preparation, and/or writing of the current scoping review protocol. HF  
30  
31 formulated the topic and conceptualized the questions and theoretical framework. She  
32  
33 also guided the research team at all stages of the review development and wrote the bulk  
34  
35 of the protocol. DB contributed critical and novel insight for the research questions,  
36  
37 theoretical framework, and review components relative to communicative functions. SAS  
38  
39 contributed critical and novel insight for the research questions and for operational  
40  
41 definitions relative to swallowing functions. She also provided advice for scoping review  
42  
43 methods and proposed analyses. ME provided conceptual input in the development of the  
44  
45 search terms relating to communicative functions in collaboration with HF and in  
46  
47 consultation from a research librarian. M-FP contributed to writing the introduction,  
48  
49 especially with respect to epidemiology of communication impairments. SM contributed  
50  
51 by drafting ideas related to the clinical relevance of the scoping review. All authors  
52  
53  
54  
55  
56  
57

1  
2  
3 reviewed multiple renditions of the manuscript, providing suggestions and editing until  
4  
5 all approved the appropriateness for submission.  
6

7  
8 **Funding:** Drs. Flowers and Bérubé received start-up funding from the Faculty of Health  
9  
10 Sciences, University of Ottawa, facilitating the development and future conduct of this  
11  
12 scoping review. Dr. Skoretz holds start-up funding from the Faculty of Medicine's  
13  
14 School of Audiology and Speech Science at the University of British Columbia.  
15  
16

17  
18 **Competing Interests:** None declared  
19

20 **Provenance and Peer Review:** Not commissioned  
21

22 **Open Access:** applicable if accepted  
23  
24  
25  
26  
27

## 28 **REFERENCES:**

- 29  
30  
31 1. Hutchon B, Gibbs D, Harniess P et al. Early intervention programmes for infants at  
32 high risk of atypical neurodevelopmental outcome. *Dev Med Child Neurol* 2019.  
33 doi:10.1111/dmcn.14187  
34  
35  
36 2. Irvine B, Luo W, León J. Report Summary Congenital Anomalies in Canada 2013: A  
37 Perinatal Health Surveillance Report by the Public Health Agency of Canada's Canadian  
38 Perinatal Surveillance System. *Health Promot Chronic Dis Prev Can* 2015;35:21-22.  
39 doi:10.24095/hpcdp.35.1.04  
40  
41  
42 3. Public Health Agency of Canada. Down Syndrome Surveillance in Canada 2005-2013.  
43 [Internet]. 2017 [cited 2018 July 7]. Available from [https://www.canada.ca/en/public-](https://www.canada.ca/en/public-health/services/publications/healthy-living/down-syndrome-surveillance-2005-2013.html)  
44 [health/services/publications/healthy-living/down-syndrome-surveillance-2005-2013.html](https://www.canada.ca/en/public-health/services/publications/healthy-living/down-syndrome-surveillance-2005-2013.html)  
45  
46  
47 4. Pavri SF. Demographics of Orofacial Clefts in Canada from 2002 to 2008. *Cleft Palate*  
48 *Craniofac J* 2013;50:224-30. doi:10.1597/10-223.  
49  
50  
51 5. Christensen D, Van Naarden Braun K, Doernberg NS, et al. Prevalence of cerebral  
52 palsy, co-occurring autism spectrum disorders, and motor functioning – Autism and  
53 Developmental Disabilities Monitoring Network, USA, 2008. *Dev Med Child Neurol*  
54 2013;56:59-65. doi:10.1111/dmcn.12268  
55  
56  
57

- 1  
2  
3  
4 6. Statistics Canada. Health Fact Sheets Preterm live births in Canada, 2000 to 2013.  
5 [Internet]. 2016 [cited 2017 July 7]. Available from  
6 <https://www150.statcan.gc.ca/n1/pub/82-625-x/2016001/article/14675-eng.htm>  
7  
8
- 9 7. Black LI, Vahratian A, Hoffman HJ. Communication disorders and use of intervention  
10 services among children aged 3–17 years: United States, 2012. NCHS data brief, no 205.  
11 Hyattsville, MD: National Center for Health Statistics 2015.  
12  
13
- 14 8. Norbury C, Gooch D, Wray C, et al. The impact of nonverbal ability on prevalence and  
15 clinical presentation of language disorder: evidence from a population study. *J Child*  
16 *Psychol Psychiatry* 2016;57:1247-57. doi:10.1111/jcpp.12573  
17  
18
- 19 9. Tomblin J, Records N, Buckwalter P, et al. Prevalence of specific language impairment  
20 in kindergarten children. *J Speech Lang Hear Res* 1997;40:1245-60.  
21 doi:10.1044/jslhr.4006.1245  
22  
23
- 24 10. Beitchman J, Nair R, Clegg M, et al. Prevalence of Speech and Language Disorders  
25 in 5-Year-Old Kindergarten Children in the Ottawa-Carleton Region. *J Speech Hear*  
26 *Disord* 1986;51:98-110. doi:10.1044/jshd.5102.98  
27  
28
- 29 11. Campbell TF, Dollaghan CA, Rickette HE, Paradise JL, Feldman HM, Shriberg LD,  
30 et al. Risk Factors for Speech Delay of Unknown Origin in 3-Year-Old Children. *Child*  
31 *Dev* 2003;74:346-357. doi:10.1111/1467-8624.7402002  
32  
33
- 34 12. Public Health Agency of Canada. Autism Spectrum Disorder among Children and  
35 Youth in Canada 2018. A Report of the National Autism Spectrum Disorder Surveillance  
36 System [Internet]. 2018 [cited 2018 July 7]. Available from  
37 [https://www.canada.ca/en/public-health/services/publications/diseases-conditions/autism-](https://www.canada.ca/en/public-health/services/publications/diseases-conditions/autism-spectrum-disorder-children-youth-canada-2018.html#a2-7)  
38 [spectrum-disorder-children-youth-canada-2018.html#a2-7](https://www.canada.ca/en/public-health/services/publications/diseases-conditions/autism-spectrum-disorder-children-youth-canada-2018.html#a2-7)  
39  
40
- 41 13. Morgan L, Wren YE. A Systematic Review of the Literature on Early Vocalizations  
42 and Babbling Patterns in Young Children. *Commun Disord Q* 2018;40:3-14.  
43 doi:10.1177/1525740118760215  
44  
45
- 46 14. AlHammadi FS. Prediction of child language development: A review of literature in  
47 early childhood communication disorders. *Lingua* 2017;199:27-35.  
48 doi:10.1016/j.lingua.2017.07.007  
49  
50
- 51 15. Etchell A, Adhikari A, Weinberg LS, Choo, et al. A systematic literature review of  
52 sex differences in childhood language and brain development. *Neuropsychologia*  
53 2018;114:19-31. doi:10.1016/j.neuropsychologia.2018.04.011  
54  
55  
56  
57

- 1  
2  
3 16. Fisher EL. A systematic review and meta-analysis of predictors of expressive-  
4 language outcomes among late talkers. *Speech Lang Hear Res* 2017;60:2935-48.  
5 doi:10.1044/2017\_JSLHR-L-16-0310  
6
- 7  
8 17. Matthews D, Biney H, Abbot-Smith, K. Individual differences in Children's  
9 pragmatic ability: A review of associations with formal language, social cognition, and  
10 executive functions. *Lang Learn Dev* 2018;14:186-223.  
11 doi:10.1080/15475441.2018.1455584  
12
- 13  
14 18. Carvalho MES, De Miranda Justo JMR, Gratier M, et al. The impact of maternal  
15 voice on the fetus: A systematic review. *Curr Women's Health Rev* 2019;15:196-206.  
16 doi:10.2174/1573404814666181026094419  
17
- 18  
19 19. Ferrari GA, Nicolini Y, Demuru E, et al. Ultrasonographic investigation of human  
20 fetus responses to maternal communicative and non-communicative stimuli. *Front*  
21 *Psychol* 2016;7. doi:10.3389/fpsyg.2016.00354  
22
- 23  
24 20. Yoo H, Bowman DA, Oller DK. The origin of protoconversation: An examination of  
25 caregiver responses to cry and speech-like vocalizations. *Front Psychol* 2018;9.  
26 doi:10.3389/fpsyg.2018.01510  
27
- 28  
29 21. Stark RE, Rose SN, Benson PJ. Classification of infant vocalization. *Int J Lang*  
30 *Commun Disord* 1978;13:41-7. doi:10.3109/13682827809011324  
31
- 32  
33 22. Emde RN, Biringen Z, Clyman RB, et al. The moral self of infancy: Affective core  
34 and procedural knowledge. *Dev Rev* 1991;11:251-70. doi:10.1016/0273-2297(91)90013-  
35 E  
36
- 37  
38 23. Sroufe LA, Coffino B, Carlson EA. Conceptualizing the role of early experience:  
39 Lessons from the minnesota longitudinal study. *Dev Rev* 2010;30:36-51.  
40 doi:10.1016/j.dr.2009.12.002  
41
- 42  
43 24. Easterbrooks MA, Bureau J-, Lyons-Ruth K. Developmental correlates and predictors  
44 of emotional availability in mother-child interaction: A longitudinal study from infancy to  
45 middle childhood. *Dev Psychopathol* 2012;24:65-78  
46
- 47  
48 25. Bigelow AE, Power M, MacLean K, et al. Mother-infant skin-to-skin contact and  
49 mother-child interaction 9 years later. *Soc Dev* 2018;27:937-51. doi:10.1111/sode.12307  
50
- 51  
52 26. Page M, Wilhelm MS, Gamble WC, et al. A comparison of maternal sensitivity and  
53 verbal stimulation as unique predictors of infant social-emotional and cognitive  
54 development. *Infant Behav Dev* 2010;33:101-10.  
55
- 56  
57 27. Bowers K, Khoury J, Sucharew H, et al. Early infant attention as a predictor of social  
58 and communicative behavior in childhood. *Int J Behav Dev* 2019;43:204-11.  
59 doi:10.1177/0165025418797001  
60

- 1  
2  
3  
4 28. Loy M, Masur EF, Olson J. Developmental changes in infants' and mothers'  
5 pathways to achieving joint attention episodes. *Infant Behav Dev* 2018;50:264-73.  
6 doi:10.1016/j.infbeh.2018.02.001  
7
- 8  
9 29. Chang L, de Barbaro K, Deák G. Contingencies between infants' gaze, vocal, and  
10 manual actions and mothers' object-naming: Longitudinal changes from 4 to 9 months.  
11 *Dev Neuropsychol* 2016;41:342-61. doi:10.1080/87565641.2016.1274313  
12
- 13  
14 30. Stevenson RD, Allaire JH. The development of normal feeding and swallowing.  
15 *Pediatr Clin North Am* 1991;38:1439-1453. doi:10.1016/S0031-3955(16)38229-3  
16
- 17  
18 31. Owens RE. Language Development: An Introduction (9<sup>th</sup> ed). Pearson/Allyn and  
19 Bacon 2016:1-126.
- 20  
21 32. Davies WH, Satter E, Berlin KS, et al. Reconceptualizing feeding and feeding  
22 disorders in interpersonal context: The case for a relational disorder. *J Fam Psychol*  
23 2006;20:409-17. doi:10.1037/0893-3200.20.3.409  
24
- 25  
26 33. Koopmans-van Beinum F, Van der Stelt. Early Stages in Infant Speech Development.  
27 *Proceedings of the Institute of Phonetic Sciences* 1979;5:30-43.
- 28  
29 34. Koopmans-van Beinum F, Van der Stelt JM. Early Stages in the Development of  
30 Speech Movements. In Lndblom B & Zetterström R (Eds.) *Precursors of Early Speech:*  
31 *Proceedings of an international symposium held at the Wenner-Gren Center, Stockholm,*  
32 *September 10-22,1984.* Basingstoke: Macmillan. 1986:37-50.  
33
- 34  
35 35. Oller DK, Wieman LA, Doyle WJ, Ross C. Infant babbling and speech. *J Child Lang*  
36 1976;3:1-11. doi:10.1017/S0305000900001276  
37
- 38  
39 36. Oller DK. The Emergence of the Speech Capacity. Mahwah, NJ: Lawrence Erlbaum  
40 Associates, Publishers 2000. doi: 10.1121/1.1388001
- 41  
42 37. Bernhardt M., Stemberger J, Charest M. Intervention for speech production in  
43 children and adolescents: Models of speech production and therapy approaches.  
44 introduction to the issue. *Can J Speech Lang Pathol Audiol* 2010;34:157-67.  
45
- 46  
47 38. Munakata Y, McClelland, JL. Connectionist models of development. *Dev Sci*  
48 2003;6:413-29. doi:10.1111/1467-7687.00296
- 49  
50 39. Nixon GM, Charbonneau I, Kermack AS, Brouillette RT, McFarland DH.  
51 Respiratory-swallowing interactions during sleep in premature infants at term. *Respir*  
52 *Physiol Neurobiol* 2008;160:76-82. doi:10.1016/j.resp.2007.08.010  
53  
54  
55  
56  
57  
58  
59  
60

- 1  
2  
3 40. Paydarfar D, Gilbert RJ, Poppel CS, Nassab PF. Respiratory phase resetting and  
4 airflow changes induced by swallowing in humans. *J Physiol* 1995;483(1):273-288.  
5 doi:10.1113/jphysiol.1995.sp020584  
6  
7  
8 41. Selley WG, Ellis RE, Flack FC, Brooks WA. Coordination of sucking, swallowing  
9 and breathing in the newborn: Its relationship to infant feeding and normal development.  
10 *Int J Lang Commun Disord* 1990;25(3):311-327. doi:10.3109/13682829009011980  
11  
12 42. Duvallet C, Larson K, Snapper S, et al. Aerodigestive sampling reveals altered  
13 microbial exchange between lung, oropharyngeal, and gastric microbiomes in children  
14 with impaired swallow function. *PLoS ONE* 2019;14. doi:10.1371/journal.pone.0216453  
15  
16  
17 43. Rawool VW. Prevalence of auditory problems in children with feeding and  
18 swallowing disorders. *J Speech Lang Hear Res* 2017;60:1436-47.  
19 doi:10.1044/2016\_JSLHR-H-16-0217  
20  
21  
22 44. Yüksel F, Doğan M, Karataş D, et al. Gastroesophageal reflux disease in children  
23 with chronic otitis media with effusion. *J Craniofac Surg* 2013;24:380-3.  
24 doi:10.1097/SCS.0b013e31827feb08  
25  
26  
27 45. Cai T, McPherson B. Hearing loss in children with otitis media with effusion: A  
28 systematic review. *Int J Audiol* 2017;56:65-76. doi:10.1080/14992027.2016.1250960  
29  
30  
31 46. Rommel N, Veereman G. GERD and Dysphagia. In: Vandenplas Y ed.  
32 Gastroesophageal Reflux in Children. Springer International Publishing 2017.  
33 doi:10.1007/978-3-319-60678-1\_10.  
34  
35 47. World Health Organization. International Classification of Diseases for Mortality and  
36 Morbidity Statistics. 11th Revision, Reference Guide. [Internet]. 2018 [cited 2018 23  
37 Nov]. Available from [https://icd.who.int/browse11/l-](https://icd.who.int/browse11/l-m/en#http%3a%2f%2fid.who.int%2fid%2fentity%2f1412387537)  
38 [m/en#http%3a%2f%2fid.who.int%2fid%2fentity%2f1412387537](https://icd.who.int/browse11/l-m/en#http%3a%2f%2fid.who.int%2fid%2fentity%2f1412387537)  
39  
40  
41 48. Delaney AL, Arvedson JC. Development of swallowing and feeding: Prenatal  
42 through first year of life. *Devel Disabil Res Rev* 2008;14:105-17. doi:10.1002/ddrr.16  
43  
44  
45 49. Pinker S. Out of the minds of babes. *Science* 1999;283(5398):40-41.  
46 doi:10.1126/science.283.5398.40  
47  
48  
49 50. Nugent JK, Bartlett JD, Von Ende A, et al. The effects of the newborn behavioral  
50 observations (NBO) system on sensitivity in mother-infant interactions. *Infants Young  
51 Child* 2017;30:257-268. doi:10.1097/IYC.000000000000103  
52  
53  
54 51. Barlow J, Herath NI, Bartram Torrance C, et al. The neonatal behavioral assessment  
55 scale (NBAS) and newborn behavioral observations (NBO) system for supporting  
56 caregivers and improving outcomes in caregivers and their infants. *Cochrane Database  
57 Syst Rev* 2018;3:CD011754. doi:10.1002/14651858.CD011754.pub2  
58  
59  
60

- 1  
2  
3 52. Shaker CS. Cue-based feeding in the NICU: Using the infant's communication as a  
4 guide. *Neonatal Netw* 2013;32:404-8. doi:10.1891/0730-0832.32.6.404  
5  
6  
7 53. Whetten CH. Cue-based feeding in the NICU. *Nurs Womens Health* 2016;20:507-10.  
8 doi:10.1016/j.nwh.2016.08.006  
9  
10 54. Adams-Chapman I, Bann CM, Vaucher YE, et al. Association between feeding  
11 difficulties and language delay in preterm infants using Bayley scales of infant  
12 development-third edition. *J Pediatr* 2013;163:680-5.e3. doi:10.1016/j.jpeds.2013.03.006  
13  
14  
15 55. Barnevik Olsson M, Carlsson LH, Westerlund J, et al. Autism before diagnosis:  
16 crying, feeding and sleeping problems in the first two years of life. *Acta Paediatr*  
17 2013;102:635-9. doi :10.1111/apa.12229  
18  
19 56. Girard L-, Doyle O, Tremblay RE. Breastfeeding, cognitive and noncognitive  
20 development in early childhood: A population study. *Pediatrics* 2017;139.  
21 doi:10.1542/peds.2016-1848  
22  
23  
24 57. Malas K, Trudeau N, Chagnon M, et al. Feeding-swallowing difficulties in children  
25 later diagnosed with language impairment. *Dev Med Child Neurol* 2015;57:872-9.  
26 doi:10.1111/dmcn.12749  
27  
28  
29 58. Malas K, Trudeau N, Giroux M, et al. Prior history of feeding–swallowing difficulties  
30 in children with language impairment. *Am J Speech Lang Pathol* 2017;26:138-45.  
31 doi:10.1044/2016\_AJSLP-15-0171  
32  
33  
34 59. Palladino RRR, Cunha MC, de Paula Souza LA. Language and eating problems in  
35 children: Co-occurrences or coincidences? *Pro Fono* 2007;19:205-14.  
36  
37 60. Joanne Briggs Institute. Reviewer's Manual 2015: Methodology for JBI Scoping  
38 Reviews. 2015: Joanne Briggs Institute, Australia.  
39 [http://joannabriggs.org/assets/docs/sumari/Reviewers-Manual\\_Methodology-for-JBI-](http://joannabriggs.org/assets/docs/sumari/Reviewers-Manual_Methodology-for-JBI-Scoping-Reviews_2015_v2.pdf)  
40 [Scoping-Reviews\\_2015\\_v2.pdf](http://joannabriggs.org/assets/docs/sumari/Reviewers-Manual_Methodology-for-JBI-Scoping-Reviews_2015_v2.pdf) (accessed 7 Jul 2018).  
41  
42 61. Arksey H, O'Malley L. Scoping studies: Towards a methodological framework. *Int J*  
43 *Soc Res Methodol: Theory Pract* 2005;8:19-32. doi:10.1186/1748-5908-5-69  
44  
45 62. Levac D, Colquhoun H, O'Brien KK. Scoping studies: Advancing the methodology.  
46 *Implement Sci* 2010;5. doi:10.1186/1748-5908-5-69  
47  
48  
49 63. Moher D, Shamseer L, Clarke M, Ghersi D, Liberati A, Petticrew M, et al. Preferred  
50 reporting items for systematic review and meta-analysis protocols (PRISMA-P) 2015  
51 statement. *Syst Rev* 2015;4. doi:10.1186/2046-4053-4-1  
52  
53  
54  
55  
56  
57  
58  
59  
60



- 1  
2  
3 64. Shamseer L, Moher D, Clarke M, Ghersi D, Liberati A, Petticrew M, et al. Preferred  
4 reporting items for systematic review and meta-analysis protocols (prisma-p) 2015:  
5 Elaboration and explanation. *Br Med J (Online)* 2015;349. doi:10.1136/bmj.g7647  
6  
7  
8 65. Bessell A, Hooper L, Shaw WC, Reilly S, Reid J, Glennly AM. Feeding interventions  
9 for growth and development in infants with cleft lip, cleft palate or cleft lip and palate.  
10 *Cochrane Database Syst Rev* 2011;2  
11  
12 66. Morgan AT, Dodrill P, Ward EC. Interventions for oropharyngeal dysphagia in  
13 children with neurological impairment. *Cochrane Database Syst Rev* 2012;10.  
14  
15 67. Psaila K, Foster JP, Richards R, Jeffery HE. Non-nutritive sucking for gastro-  
16 oesophageal reflux disease in preterm and low birth weight infants. *Cochrane Database*  
17 *Syst Rev* 2014;10:1-13. doi:10.1002/14651858.CD009817.pub2  
18  
19 68. Tighe M, Afzal NA, Bevan A, Hayen A, Munro A, Beattie RM. Pharmacological  
20 treatment of children with gastro-oesophageal reflux. *Cochrane Database Syst Rev*  
21 2014;11. doi:10.1002/14651858.CD008550.pub2  
22  
23 69. Brignell A, Song H, Zhu J, Suo C, Lu D, Morgan AT. Communication intervention  
24 for autism spectrum disorders in minimally verbal children. *Cochrane Database Syst Rev*  
25 2016;8. doi:10.1002/14651858.CD012324  
26  
27 70. Law J, Dennis JA, Charlton JJ. Speech and language therapy interventions for  
28 children with primary speech and/or language disorders. *Cochrane Database Syst Rev*  
29 2017;1. doi:10.1002/14651858.CD012490  
30  
31 71. Lee AS-, Gibbon FE. Non-speech oral motor treatment for children with  
32 developmental speech sound disorders. *Cochrane Database Syst Rev* 2015;3.  
33 doi:10.1002/14651858.CD009383.pub2  
34  
35 72. Morgan AT, Vogel AP. A Cochrane review of treatment for childhood apraxia of  
36 speech. *Eur J Phys Rehabil Med* 2009;45:103-110.  
37  
38 73. Desmeules R. Filter to Retrieve Pediatric Articles in the OVID Medline Database.  
39 John W Scott Health Sciences Library, University of Alberta. [Internet]. [cited 2018 Nov  
40 23]. Available from Filter-20to-20Retrieve-20Pediatrics-20Articles-20in-20OVID-  
41 20EMBASE in era.library.ualberta.ca  
42  
43 74. Manca A, Moher D, Cugusi L, Dvir Z, et al. How predatory journals leak into  
44 PubMed. *CMAJ* 2018;190:E1042-E1045. doi:10.1503/cmaj.180154  
45  
46 75. Booth A. Unpacking your literature search toolbox: on search styles and tactics.  
47 *Health Info Libr J* 2008;25:313-7. doi:10.1111/j.1471-1842.2008.00825.x  
48  
49  
50  
51  
52  
53  
54  
55  
56  
57  
58  
59  
60

1  
2  
3  
4  
5  
6  
7  
8  
9  
10  
11  
12  
13  
14  
15  
16  
17  
18  
19  
20  
21  
22  
23  
24  
25  
26  
27  
28  
29  
30  
31  
32  
33  
34  
35  
36  
37  
38  
39  
40  
41  
42  
43  
44  
45  
46  
47  
48  
49  
50  
51  
52  
53  
54  
55  
56  
57  
58  
59  
60

76. Covidence systematic review software, Veritas Health Innovation, Melbourne, Australia. [www.covidence.org](http://www.covidence.org) (accessed Aug 2018).

For peer review only

**Supplementary Table 1.** PRISMA-P (Preferred Reporting Items for Systematic review and Meta-Analysis Protocols) 2015 checklist: recommended items to address in a systematic review protocol\*

| Section and topic                 | Item No | Checklist item                                                                                                                                                                                                                | Page #s |
|-----------------------------------|---------|-------------------------------------------------------------------------------------------------------------------------------------------------------------------------------------------------------------------------------|---------|
| <b>ADMINISTRATIVE INFORMATION</b> |         |                                                                                                                                                                                                                               |         |
| Title:                            |         |                                                                                                                                                                                                                               |         |
| Identification                    | 1a      | Identify the report as a protocol of a systematic review                                                                                                                                                                      | 1       |
| Update                            | 1b      | If the protocol is for an update of a previous systematic review, identify as such                                                                                                                                            | n/a     |
| Registration                      | 2       | If registered, provide the name of the registry (such as PROSPERO) and registration number                                                                                                                                    | n/a     |
| Authors:                          |         |                                                                                                                                                                                                                               |         |
| Contact                           | 3a      | Provide name, institutional affiliation, e-mail address of all protocol authors; provide physical mailing address of corresponding author                                                                                     | 1       |
| Contributions                     | 3b      | Describe contributions of protocol authors and identify the guarantor of the review                                                                                                                                           | 21-22   |
| Amendments                        | 4       | If the protocol represents an amendment of a previously completed or published protocol, identify as such and list changes; otherwise, state plan for documenting important protocol amendments                               | n/a     |
| Support:                          |         |                                                                                                                                                                                                                               |         |
| Sources                           | 5a      | Indicate sources of financial or other support for the review                                                                                                                                                                 | 22      |
| Sponsor                           | 5b      | Provide name for the review funder and/or sponsor                                                                                                                                                                             | 22      |
| Role of sponsor or funder         | 5c      | Describe roles of funder(s), sponsor(s), and/or institution(s), if any, in developing the protocol                                                                                                                            | 22      |
| <b>INTRODUCTION</b>               |         |                                                                                                                                                                                                                               |         |
| Rationale                         | 6       | Describe the rationale for the review in the context of what is already known                                                                                                                                                 | 3-7     |
| Objectives                        | 7       | Provide an explicit statement of the question(s) the review will address with reference to participants, interventions, comparators, and outcomes (PICO)                                                                      | 10-11   |
| <b>METHODS</b>                    |         |                                                                                                                                                                                                                               |         |
| Eligibility criteria              | 8       | Specify the study characteristics (such as PICO, study design, setting, time frame) and report characteristics (such as years considered, language, publication status) to be used as criteria for eligibility for the review | 17-18   |

|                                    |     |                                                                                                                                                                                                                                                  |       |
|------------------------------------|-----|--------------------------------------------------------------------------------------------------------------------------------------------------------------------------------------------------------------------------------------------------|-------|
| Information sources                | 9   | Describe all intended information sources (such as electronic databases, contact with study authors, trial registers or other grey literature sources) with planned dates of coverage                                                            | 12-15 |
| Search strategy                    | 10  | Present draft of search strategy to be used for at least one electronic database, including planned limits, such that it could be repeated                                                                                                       | 13-15 |
| Study records:                     |     |                                                                                                                                                                                                                                                  |       |
| Data management                    | 11a | Describe the mechanism(s) that will be used to manage records and data throughout the review                                                                                                                                                     | 16-18 |
| Selection process                  | 11b | State the process that will be used for selecting studies (such as two independent reviewers) through each phase of the review (that is, screening, eligibility and inclusion in meta-analysis)                                                  | 16-18 |
| Data collection process            | 11c | Describe planned method of extracting data from reports (such as piloting forms, done independently, in duplicate), any processes for obtaining and confirming data from investigators                                                           | 16-18 |
| Data items                         | 12  | List and define all variables for which data will be sought (such as PICO items, funding sources), any pre-planned data assumptions and simplifications                                                                                          | 18-20 |
| Outcomes and prioritization        | 13  | List and define all outcomes for which data will be sought, including prioritization of main and additional outcomes, with rationale                                                                                                             | 7-11  |
| Risk of bias in individual studies | 14  | Describe anticipated methods for assessing risk of bias of individual studies, including whether this will be done at the outcome or study level, or both; state how this information will be used in data synthesis                             | n/a   |
| Data synthesis                     | 15a | Describe criteria under which study data will be quantitatively synthesised                                                                                                                                                                      | 18-20 |
|                                    | 15b | If data are appropriate for quantitative synthesis, describe planned summary measures, methods of handling data and methods of combining data from studies, including any planned exploration of consistency (such as $I^2$ , Kendall's $\tau$ ) | n/a   |
|                                    | 15c | Describe any proposed additional analyses (such as sensitivity or subgroup analyses, meta-regression)                                                                                                                                            | n/a   |
|                                    | 15d | If quantitative synthesis is not appropriate, describe the type of summary planned                                                                                                                                                               | 18-20 |
| Meta-bias(es)                      | 16  | Specify any planned assessment of meta-bias(es) (such as publication bias across studies, selective reporting within studies)                                                                                                                    | n/a   |

1  
2  
3  
4  
5  
6  
7  
8  
9  
10  
11  
12  
13  
14  
15  
16  
17  
18  
19  
20  
21  
22  
23  
24  
25  
26  
27  
28  
29  
30  
31  
32  
33  
34  
35  
36  
37  
38  
39  
40  
41  
42  
43  
44  
45  
46  
47  
48  
49  
50  
51  
52  
53  
54  
55  
56  
57  
58  
59  
60

---

|                                   |    |                                                                                    |     |
|-----------------------------------|----|------------------------------------------------------------------------------------|-----|
| Confidence in cumulative evidence | 17 | Describe how the strength of the body of evidence will be assessed (such as GRADE) | n/a |
|-----------------------------------|----|------------------------------------------------------------------------------------|-----|

---

\* It is strongly recommended that this checklist be read in conjunction with the PRISMA-P Explanation and Elaboration (cite when available) for important clarification on the items. Amendments to a review protocol should be tracked and dated. The copyright for PRISMA-P (including checklist) is held by the PRISMA-P Group and is distributed under a Creative Commons Attribution Licence 4.0.  
n/a = not applicable

*From: Shamseer L, Moher D, Clarke M, Ghersi D, Liberati A, Petticrew M, Shekelle P, Stewart L, PRISMA-P Group. Preferred reporting items for systematic review and meta-analysis protocols (PRISMA-P) 2015: elaboration and explanation. BMJ. 2015 Jan 2;349(jan02 1):g7647.*

**Supplementary Table 1.** PRISMA-P (Preferred Reporting Items for Systematic review and Meta-Analysis Protocols) 2015 checklist: recommended items to address in a systematic review protocol\*

| Section and topic                 | Item No | Checklist item                                                                                                                                                                                                                | Page #s |
|-----------------------------------|---------|-------------------------------------------------------------------------------------------------------------------------------------------------------------------------------------------------------------------------------|---------|
| <b>ADMINISTRATIVE INFORMATION</b> |         |                                                                                                                                                                                                                               |         |
| Title:                            |         |                                                                                                                                                                                                                               |         |
| Identification                    | 1a      | Identify the report as a protocol of a systematic review                                                                                                                                                                      | 1       |
| Update                            | 1b      | If the protocol is for an update of a previous systematic review, identify as such                                                                                                                                            | n/a     |
| Registration                      | 2       | If registered, provide the name of the registry (such as PROSPERO) and registration number                                                                                                                                    | n/a     |
| Authors:                          |         |                                                                                                                                                                                                                               |         |
| Contact                           | 3a      | Provide name, institutional affiliation, e-mail address of all protocol authors; provide physical mailing address of corresponding author                                                                                     | 1       |
| Contributions                     | 3b      | Describe contributions of protocol authors and identify the guarantor of the review                                                                                                                                           | 21-22   |
| Amendments                        | 4       | If the protocol represents an amendment of a previously completed or published protocol, identify as such and list changes; otherwise, state plan for documenting important protocol amendments                               | n/a     |
| Support:                          |         |                                                                                                                                                                                                                               |         |
| Sources                           | 5a      | Indicate sources of financial or other support for the review                                                                                                                                                                 | 22      |
| Sponsor                           | 5b      | Provide name for the review funder and/or sponsor                                                                                                                                                                             | 22      |
| Role of sponsor or funder         | 5c      | Describe roles of funder(s), sponsor(s), and/or institution(s), if any, in developing the protocol                                                                                                                            | 22      |
| <b>INTRODUCTION</b>               |         |                                                                                                                                                                                                                               |         |
| Rationale                         | 6       | Describe the rationale for the review in the context of what is already known                                                                                                                                                 | 3-7     |
| Objectives                        | 7       | Provide an explicit statement of the question(s) the review will address with reference to participants, interventions, comparators, and outcomes (PICO)                                                                      | 10-11   |
| <b>METHODS</b>                    |         |                                                                                                                                                                                                                               |         |
| Eligibility criteria              | 8       | Specify the study characteristics (such as PICO, study design, setting, time frame) and report characteristics (such as years considered, language, publication status) to be used as criteria for eligibility for the review | 17-18   |

|                                    |     |                                                                                                                                                                                                                                                  |       |
|------------------------------------|-----|--------------------------------------------------------------------------------------------------------------------------------------------------------------------------------------------------------------------------------------------------|-------|
| Information sources                | 9   | Describe all intended information sources (such as electronic databases, contact with study authors, trial registers or other grey literature sources) with planned dates of coverage                                                            | 12-15 |
| Search strategy                    | 10  | Present draft of search strategy to be used for at least one electronic database, including planned limits, such that it could be repeated                                                                                                       | 13-15 |
| Study records:                     |     |                                                                                                                                                                                                                                                  |       |
| Data management                    | 11a | Describe the mechanism(s) that will be used to manage records and data throughout the review                                                                                                                                                     | 16-18 |
| Selection process                  | 11b | State the process that will be used for selecting studies (such as two independent reviewers) through each phase of the review (that is, screening, eligibility and inclusion in meta-analysis)                                                  | 16-18 |
| Data collection process            | 11c | Describe planned method of extracting data from reports (such as piloting forms, done independently, in duplicate), any processes for obtaining and confirming data from investigators                                                           | 16-18 |
| Data items                         | 12  | List and define all variables for which data will be sought (such as PICO items, funding sources), any pre-planned data assumptions and simplifications                                                                                          | 18-20 |
| Outcomes and prioritization        | 13  | List and define all outcomes for which data will be sought, including prioritization of main and additional outcomes, with rationale                                                                                                             | 7-11  |
| Risk of bias in individual studies | 14  | Describe anticipated methods for assessing risk of bias of individual studies, including whether this will be done at the outcome or study level, or both; state how this information will be used in data synthesis                             | n/a   |
| Data synthesis                     | 15a | Describe criteria under which study data will be quantitatively synthesised                                                                                                                                                                      | 18-20 |
|                                    | 15b | If data are appropriate for quantitative synthesis, describe planned summary measures, methods of handling data and methods of combining data from studies, including any planned exploration of consistency (such as $I^2$ , Kendall's $\tau$ ) | n/a   |
|                                    | 15c | Describe any proposed additional analyses (such as sensitivity or subgroup analyses, meta-regression)                                                                                                                                            | n/a   |
|                                    | 15d | If quantitative synthesis is not appropriate, describe the type of summary planned                                                                                                                                                               | 18-20 |
| Meta-bias(es)                      | 16  | Specify any planned assessment of meta-bias(es) (such as publication bias across studies, selective reporting within studies)                                                                                                                    | n/a   |

1  
2  
3  
4  
5  
6  
7  
8  
9  
10  
11  
12  
13  
14  
15  
16  
17  
18  
19  
20  
21  
22  
23  
24  
25  
26  
27  
28  
29  
30  
31  
32  
33  
34  
35  
36  
37  
38  
39  
40  
41  
42  
43  
44  
45  
46  
47  
48  
49  
50  
51  
52  
53  
54  
55  
56  
57  
58  
59  
60

---

|                                   |                                                                                       |     |
|-----------------------------------|---------------------------------------------------------------------------------------|-----|
| Confidence in cumulative evidence | 17 Describe how the strength of the body of evidence will be assessed (such as GRADE) | n/a |
|-----------------------------------|---------------------------------------------------------------------------------------|-----|

---

\* It is strongly recommended that this checklist be read in conjunction with the PRISMA-P Explanation and Elaboration (cite when available) for important clarification on the items. Amendments to a review protocol should be tracked and dated. The copyright for PRISMA-P (including checklist) is held by the PRISMA-P Group and is distributed under a Creative Commons Attribution Licence 4.0.  
n/a = not applicable

*From: Shamseer L, Moher D, Clarke M, Ghersi D, Liberati A, Petticrew M, Shekelle P, Stewart L, PRISMA-P Group. Preferred reporting items for systematic review and meta-analysis protocols (PRISMA-P) 2015: elaboration and explanation. BMJ. 2015 Jan 2;349(jan02 1):g7647.*
